1           **Various components of the RNAi pathway are required for conidiation,**  
2           **ascosporogenesis, virulence, DON production and SIGS-mediated fungal inhibition by**  
3           **exogenous dsRNA in the Head Blight pathogen *Fusarium graminearum***

4  
5  
6 Fatima Yousif Gaffar<sup>1†</sup>, Jafargholi Imani<sup>1†</sup>, Petr Karlovsky<sup>2</sup>, Aline Koch<sup>1</sup>, Karl-Heinz Kogel<sup>1</sup>

7  
8 <sup>1</sup> Department of Phytopathology, Centre for BioSystems, Land Use and Nutrition, Justus Liebig  
9 University, Heinrich-Buff-Ring 26-32, D-35392, Giessen, Germany

10 <sup>2</sup> Department of Crop Sciences, Molecular Phytopathology and Mycotoxin Research,  
11 University of Goettingen, D-37077 Goettingen, Germany

12 Email addresses:

13 Fatima.Y.Gaffar@agrار.uni-giessen.de

14 [Jafargholi.Imani@agrار.uni-giessen.de](mailto:Jafargholi.Imani@agrار.uni-giessen.de)

15 pkarlov@gwdg.de

16 [Aine.Koch@agrار.uni-giessen.de](mailto:Aine.Koch@agrار.uni-giessen.de)

17 Karl-Heinz.Kogel@agrار.uni-giessen.de

18  
19 \*Correspondence to Karl-Heinz.Kogel@agrار.uni-giessen.de

20 † Contributed equally to this work.

21

22 **Abstract:**

23 Gene silencing through RNA interference (RNAi) shapes many biological processes in  
24 filamentous fungi. In this study we explored the contribution of several key proteins of fungal  
25 RNAi pathways, including DICER-like1 and 2 (FgDCL1, FgDCL2), ARGONAUTE1 and 2  
26 (FgAGO1, FgAGO2), AGO-interacting protein FgQIP (QDE2-interacting protein), RecQ  
27 helicase (FgQDE3), and four RNA-dependent RNA polymerases (FgRdRP1, FgRdRP2,  
28 FgRdRP3, FgRdRP4), to sexual and asexual multiplication, pathogenicity as well as spray-  
29 induced gene silencing (SIGS) by exogenous dsRNA of the ascomycete fungus *Fusarium*  
30 *graminearum* (*Fg*). We corroborate and extend earlier findings that conidiation,  
31 ascosporeogenesis and Fusarium Head Blight (FHB) symptom development require operable  
32 RNAi pathways. Of note, the involvement of RNAi components in conidiation is dependent on  
33 environmental conditions as it is detectable only under low light ( $< 2 \mu\text{mol m}^{-2} \text{s}^{-1}$ ). Although  
34 both DCLs and AGOs partially share their functions, the sex-specific RNAi pathway  
35 (ascosporeogenesis) is mediated primarily by FgDCL1 and FgAGO2, while the RNAi  
36 components FgDCL2 and FgAGO1 contribute to conidia formation and germination. Similarly,  
37 FgDCL1 and FgAGO2 account for pathogenesis as their knock-out (KO) results in reduced  
38 FHB development. Apart from  $\Delta dcl2$  and  $\Delta ago1$ , the KO mutants  $\Delta rdrp2$ ,  $\Delta rdrp3$ ,  $\Delta rdrp4$ ,  
39  $\Delta qde3$  and  $\Delta qip$  are strongly compromised for conidiation, while KO mutations in all RdPRs,  
40 QDE3 and QIP strongly affect ascosporeogenesis. Analysis of trichothecenes mycotoxins in  
41 wheat kernels showed that the relative amount of DON [rDON], calculated as [DON] per  
42 amount of fungal genomic DNA, was reduced in all spikes infected with RNAi mutants,  
43 suggesting that fungal RNAi pathways affect *Fg*'s DON production in wheat spikes. Moreover,  
44 SIGS-mediated plant protection to Fusarium was strongly dependent on fungal DCLs, AGOs,  
45 and QIP, but not on QDE3. Together these data show that in *F. graminearum* the RNAi  
46 machinery plays a central role in different steps of sexual and asexual reproduction, in fungal  
47 pathogenicity and DON production, and in the control of the pathogen by exogenous dsRNA  
48 under the tested conditions.

49

50 **Introduction:**

51 RNA interference (RNAi) is a conserved mechanism triggered by double-stranded (ds)RNA  
52 that mediates resistance to exogenous pathogenic nucleic acids, regulates the expression of  
53 protein-coding genes on the transcriptional and posttranscriptional level and preserves gene  
54 stability by transposon silencing (Fire et al., 1998; Mello et al., 2004; Hammond, 2005;  
55 Baulcombe 2013). Many reports have demonstrated that this natural mechanism for sequence-  
56 specific gene silencing also holds promise for experimental biology and offers practical  
57 applications in functional genomics, therapeutic intervention, and agriculture (Nowara et al.,  
58 2010; Koch and Kogel, 2014; Cai et al., 2018; Zanini et al., 2018). The core RNAi pathway  
59 components are conserved in eukaryotes, including nearly all parasitic and beneficial fungi  
60 (Cogoni and Macino, 1999; Dang et al., 2011; Carreras-Villaseñor et al., 2013; Torres-Martínez  
61 and Ruiz-Vázquez, 2017): DICER-like (DCL) enzymes, which belong to the RNase III  
62 superfamily, initiate the RNAi pathway by generating small interfering (si)RNA and micro  
63 (mi)RNAs (Meng et al., 2017; Song and Rossi, 2017); ARGONAUTE (AGO) superfamily  
64 proteins bind small RNAs (sRNAs) to form an RNA-induced silencing complex (RISC) for  
65 transcriptional and post-transcriptional gene silencing (Zhang et al., 2015; Nguyen et al., 2018)  
66 and RNA-dependent RNA polymerases (RdRPs) are involved in the production of dsRNA that  
67 initiate the silencing mechanism as well as in the amplification of the silencing signal through  
68 secondary RNA (Calo et al., 2012).

69 Fungal RNAi pathways contribute to genome protection (Meng et al. 2017), pathogenicity  
70 (Weiberg et al., 2013; Kusch et al., 2018), development (Carreras-Villaseñor et al., 2013), and  
71 antiviral defense (Segers et al., 2007; Campo et al., 2016. In *Aspergillus flavus* (Bai et al., 2015),  
72 *Magnaporthe oryzae* (Raman et al., 2017) and *Penicillium marneffeii* (Lau et al., 2013), sRNAs  
73 were shown to be responsive to environmental stress. In *Trichoderma atroviride*, both light-  
74 dependent asexual reproduction and light-independent hyphal growth require an operational  
75 RNAi machinery (Carreras-Villaseñor et al., 2013). Similarly, in *Mucor circinelloides*, defects  
76 in the RNAi machinery resulted in various developmental defects such as dysfunction during  
77 sexual and asexual reproduction (Torres-Martínez and Ruiz-Vázquez, 2017).

78 *Neurospora crassa*, a model organism for studying gene silencing pathways in filamentous  
79 fungi, has two different silencing pathways, namely quelling (Romano et al., 1992) and meiotic  
80 silencing by unpaired DNA (MSUD) (Shiu et al., 2001). In the vegetative stage, the introduction  
81 of repetitive DNA sequences triggers posttranscriptional gene silencing of all homologous  
82 genes, an RNAi silencing phenomenon known as quelling, while MSUD is associated with the  
83 sexual cycle. *QDE3* (*Quelling defective3*), which encodes a RecQ helicase, and RPA (subunit

84 of replication protein A) which recognizes aberrant DNA structures and recruits QDE1  
85 (Quelling defective1), which is a RdRP, to the ssDNA locus, resulting in production of aberrant  
86 RNAs and its conversion to dsRNAs. Subsequently the dsRNA is processed into sRNA  
87 duplexes by DCL1. The sRNAs are loaded onto QDE2 (Quelling defective2), which encodes  
88 an AGO homolog. QDE2 cleaves the passenger strand and the putative exonuclease QIP  
89 (QDE2-interacting protein) removes it to form an active RISC that targets complementary  
90 mRNA for degradation (Chang et al., 2012).

91 MSUD, on the other hand, occurs during sexual development in prophase I of meiosis, when  
92 unpaired homologous DNA sequences have been detected during the pairing of the homologous  
93 chromosomes, which leads to the production of aberrant RNA transcripts (Chang et al., 2012).  
94 Components of the RNAi machinery involved in MSUD are also important for ascospore  
95 formation in *N. crassa* (Shiu et al., 2001; Alexander et al., 2008; Lee et al., 2003).

96 *Fusarium graminearum* (*Fg*) is one of the most devastating pathogens of many cereals causing  
97 Fusarium Head Blight (FHB) and Crown Rot (FCR). The pathogen belongs to the filamentous  
98 ascomycetes (Dean et al., 2012; Urban et al., 2015; Brown et al., 2017). The fungus reproduces  
99 using sexual spores (ascospores) and asexual conidia. Ascospores are the primary inoculum for  
100 FHB epidemics, because these spores are forcibly shot into the environment and can pass long  
101 distances (Maldonado-Ramirez et al., 2005). Moreover, the sexual development warrants the  
102 formation of survival structures necessary for overwintering (Dill-Macky and Jones, 2000) and  
103 the genetic diversity of the population (Cuomo et al. 2007). Importantly, fungi of the genus  
104 *Fusarium* contaminate the grain with mycotoxins and thus decrease grain quality Harris et al.,  
105 2016). Among the mycotoxins, the B group trichothecenes, including deoxynivalenol (DON),  
106 nivalenol (NIV), and their acetylated derivatives (3A-DON, 15A-DON, and 4A-NIV) influence  
107 the virulence of the fungus (Ilgen et al., 2009; Desjardins et al., 1993; Jansen et al., 2005). It  
108 has been suggested that mycotoxins such as DON trigger an oxidative burst in the host plants,  
109 resulting in cell necrosis and disintegration of the defense system, which then favors  
110 colonization of the plant tissues by a necrotrophic fungus (Audenaert et al., 2014).

111 To develop RNAi-based plant protection strategies such as host-induced gene silencing (HIGS)  
112 (Koch et al. 2013) and spray-induced gene silencing (SIGS) (Koch et al., 2016; Koch et al.  
113 2018) against *Fusarium* species, it is required to bank on knowledge about the RNAi  
114 components involved in *Fusarium* development and pathogenicity. Of note, a report of Chen  
115 and colleagues (Chen et al., 2015) demonstrated that, in *Fg*, a hairpin RNA (hpRNA) can  
116 efficiently silence the expression level of a target gene, and that the RNAi components  
117 FgDCL2 and FgAGO1 are required for silencing. This finding is partially consistent with

118 reports showing that a *Fg* wild type (wt) strain, but not *Fg* RNAi mutants, are amenable to  
119 target gene silencing, when it grows on a plant sprayed with exogenous dsRNA directed  
120 against the fungal *Cytochrome P450 lanosterol C-14 $\alpha$ -demethylase (CYP51)* gene (Koch et al.,  
121 2016).

122 *F. graminearum* possesses a functional MSUD mechanism (Son et al., 2011). The *AGO* genes  
123 *FgSMS2* or *FgAGO2* are necessary for sexual reproduction (Kim et al., 2015). A more recent  
124 work discovered that the sex-induced RNAi mechanism had important roles in sexual  
125 reproduction of the fungus (Son et al., 2017). siRNAs produced from exonic gene regions (ex-  
126 siRNAs) participated in post-transcriptional gene regulation at a genome-wide level in the late  
127 stages of sexual reproduction (Son et al., 2017). The sex-specific RNAi pathway was primarily  
128 governed by *FgDCL1* and *FgAGO2*. Thus, *F. graminearum* primarily utilizes ex-siRNA-  
129 mediated RNAi for ascospore formation. Consistent with the key role of *FgDCL1* in generative  
130 development, the combination of sRNA and transcriptome sequencing predicted 143 novel  
131 microRNA-like RNAs (milRNAs) in wild-type perithecia, of which most were depended on  
132 *FgDCL1*. Given that 117 potential target genes were predicted, these perithecium-specific  
133 milRNAs may play roles in sexual development (Zeng et al., 2018).

134 In this study, we extended these previous studies to address the requirement of an extended set  
135 of *F. graminearum* RNAi genes in growth, reproduction, virulence, and toxin production.

136

137 **Results:**

138 **Core components of the RNAi pathway of *F. graminearum* are not required for light**  
139 **induced conidiation**

140 The *Fg* genome obtained from the Broad Institute ([www.broadinstitute.org](http://www.broadinstitute.org)) contains many  
141 functional RNAi machinery components (Chen et al., 2015; Son et al., 2017). We generated *Fg*  
142 gene replacement mutants for several major RNAi genes by homolog recombination using the  
143 pPK2 binary vector (Tab. 1). Disruption vectors for *FgDCL1*, *FgDCL2*, *FgAGO1*, *FgAGO2*,  
144 *FgRdRP1*, *FgRdRP2*, *FgRdRP3*, *FgRdRP4*, *FgQDE3*, and *FgQIP* were constructed by  
145 inserting two flanking fragments (~1000 bp) upstream and downstream of the corresponding  
146 genes in pPK2 vector (Table S1; Fig. S1). The vectors were introduced into *Agrobacterium*  
147 *tumefaciens*, followed by agro-transformation of the *Fg* strain IFA65. Transformants were  
148 transferred to Petri dishes of potato extract glucose (PEG) medium, containing 150 µg/ml  
149 hygromycin and 150 µg/ml ticarcillin. Respective mutants were verified by PCR analysis with  
150 genomic DNA as template (Fig. 1) and by expression analysis of the respective RNAi gene  
151 (Fig. S2). Colony morphology of PCR verified mutants (see methods, 12h/12h light/dark) was  
152 inspected in axenic cultures of three different media, PEG, synthetic nutrient (SN) agar and  
153 starch agar (SA). In the PEG agar medium, all mutants showed slightly reduced radial growth,  
154 while there were no clear differences as compared with the IFA65 (wt) strain in SN and SA  
155 media (Fig. S3 A-C). In liquid PEG medium under day light conditions, all mutants produced  
156 comparable amounts of mycelium biomass, though different amounts of the red pigment  
157 aurofusarin (Frandsen et al., 2006): *Δdcl1*, *Δdcl2*, *Δrdrp1*, *Δqde3*, and *Δqip1* showed reduced  
158 pigmentation, while *Δago1*, *Δrdrp2*, *Δrdrp3*, and *Δrdrp4* showed higher pigmentation  
159 compared to wt IFA65 (Fig. S3 D). Under light induction conditions (12 h light; 52 µmol m<sup>-2</sup>  
160 s<sup>-1</sup>), conidia grown in 96-well-plate liquid SN cultures showed normal germ tube emergence  
161 (not shown). All RNAi mutants formed an elongated hyphal cell type, producing abundant  
162 conidia on conidiophores and directly from hyphae. Conidia were moderately curved with clear  
163 septations.

164  
165 **In absence of light induction conidiation of *F. graminearum* is influenced by RNAi**  
166 **pathway genes**

167 When grown continuously under dimmed light (2 µmol m<sup>-2</sup> s<sup>-1</sup>), liquid SN cultures of RNAi  
168 mutants showed significantly reduced conidiation compared to wt IFA65, except *Δago2* and  
169 *Δrdrp1*, which were only slightly affected (Fig. 2 A). Under this non-inductive condition, some  
170 RNAi mutants also were compromised in conidial germination: *Δago1*, *Δago2* and *Δrdrp4*



171 showed significantly reduced germination, while *Ardrp3*, *Adcl1*, *Ardrp1* and *Adcl2* showed a  
172 slight reduction, and *rdrp2*, *Δqip* and *Δqde3* showed normal conidial germination (Fig. 2 B).  
173 All RNAi mutants had a normal germ tube morphology, except *Ardrp4*, which tends to develop  
174 multiple germ tubes (Fig. 2 C). These results suggest a requirement for *Fg* RNAi components  
175 genes in the full control of asexual development depending on the environmental conditions.

176

### 177 ***F. graminearum* RNAi components are required for sexual development**

178 Because there were contrasting data in the literature, we resumed asking the question of whether  
179 RNAi components are requirement for sexual reproduction. Perithecia (fruiting bodies)  
180 formation was induced in carrot agar axenic cultures (Cavinder et al., 2012). All RNAi mutants  
181 produced melanized mature perithecia in nearly the same numbers compared to wt IFA65 (not  
182 shown). Next we assessed the forcible discharge of ascospores by a spore discharge assay (Fig.  
183 3). Discharge of ascospores from perithecia into the environment results from turgor pressure  
184 within the asci; the dispersal of ascospores by forcible discharge is a proxy for fungal fitness as  
185 it is important for dissemination of the disease. To this end, half circular agar blocks covered  
186 with mature perithecia were placed on glass slides and images from forcibly fired ascospores  
187 (white cloudy) were taken after 48 h incubation in boxes under high humidity and fluorescent  
188 light. We found that the forcible discharge of ascospores was severely compromised in *Adcl1*,  
189 *Δago2*, *Ardrp1*, *Ardrp2*, *Δqde3*, and less severe in *Adcl2*, *Δago1*, *Δqip1*, while *Ardrp3* and  
190 *Ardrp4* were indistinguishable from the wt IFA65. (Fig. 3 A,B). Microscopic observation of the  
191 discharged ascospores revealed that their morphology was not affected (not shown). The  
192 percentage of discharged ascospores that retained the ability to germinate varied in the mutants  
193 with *Ardrp3* and *Ardrp4*, showing strong reduction in the ascospore germination (Fig. 3 C).  
194 Together these results support the notion that the RNAi pathway is involved in sexual  
195 reproduction. Consistent with Son et al. (2017), especially DCL1 and AGO2 have important  
196 roles in sexual reproduction in *Fusarium graminearum* by producing siRNAs (ex-siRNAs)  
197 from gene regions.

198

199

### 200 ***F. graminearum* RNAi mutants show variation in kernel infection**

201 It was reported that *Fg* mutants defective in DCL, AGO, or RdRP were not compromised in  
202 virulence on wheat spikes (Chen et al., 2015). We extended this previous study by testing  
203 additional *Fg* RNAi mutants. Conidia were point-inoculated to a single spikelet at the bottom  
204 of a spike of the susceptible wheat cultivar Apogee. Fungal colonization was quantified 9 and  
205 13 days post inoculation (dpi) by determining the infection strength. Infected parts of a spike

206 bleached out, whereas the non-inoculated spikes remained symptomless. We found that, at late  
207 infection stages (13 dpi), all RNAi mutants caused strong FHB symptoms on wheat spikes  
208 comparable with wt IFA65 (Fig. 4 A). However, there were clear differences in the severity of  
209 infections at earlier time points (9 dpi), with *Δdcl1* and *Δago2* showing a most compromised  
210 FHB development. At 13 dpi, RNAi mutants also showed considerable variation on *Fg*-infected  
211 kernel morphology (Fig. S4 A). Thousand-grain-weight (TGW) of kernels infected with RNAi  
212 mutants showed slight, though not significant differences, in the total weights compared to wt  
213 IFA65 infection (Fig. S4B).

214  
215 **DON production is compromised in *F. graminearum* mutants that show reduced**  
216 **pathogenicity on wheat kernel**

217 We quantified the amount of the mycotoxin DON in *Fg*-infected wheat spikes at 13 dpi (point-  
218 inoculation using 5  $\mu$ l of 0.002% Tween 20 water containing 40,000 conidia / mL) at mid-  
219 anthesis. Of note, the relative amount of DON [rDON], calculated as [DON] per amount of  
220 fungal genomic DNA, was reduced in virtually all spikes infected with RNAi mutants, whereby  
221 [rDON] was strongly reduced especially in spikes colonized with mutants *Δago1*, *Δrdrp1*,  
222 *Δrdrp2*, *Δrdrp3*, *Δrdrp4* and *Δqde3* as compared with wt IFA65 (Tab. 2). The data suggest that  
223 fungal RNAi pathways affect *Fg*'s DON production in wheat spikes. While [rDON] changed,  
224 the ratio of [DON] and [A-DON] (comprising 3A-DON and 15A-DON) remained constant in  
225 all mutants vs. IFA65, suggesting that the fungal RNAi pathways do not affect the trichothecene  
226 metabolism.

227  
228 ***F. graminearum* mutants *Δdcl1*, *Δdcl2*, *Δago1*, *Δago2*, *Δrdrp1* and *Δqip* are compromised in**  
229 **SIGS**

230 Next, we addressed the question which RNAi mutants are compromised in spray-induced  
231 gene silencing (SIGS). It has been shown that spraying leaves or fruits with dsRNA targeting  
232 essential fungal genes, results in substantial protection from infection and disease (Koch et  
233 al., 2016; Wang et al., 2016; Dalakouras et al., 2016; McLoughlin et al., 2018). Moreover, it  
234 was shown that a hairpin RNA (hpRNA) can efficiently silence the expression level of a  
235 fungal target gene, and that the RNAi components FgDCL2 and FgAGO1 are required for  
236 silencing (Chen et al., 2015). Similarly, a *Fgdcl1* mutant was compromised in SIGS, e.g.  
237 showing insensitivity to application of CYP3RNA, a dsRNA targeting the three fungal genes  
238 *FgCYP51A*, *FgCYP51B* and *FgCYP51C* (Koch et al., 2016). To extend these findings, we  
239 conducted a SIGS experiment on detached barley leaves that were sprayed with 20 ng  $\mu$ L<sup>-1</sup>  
240 CYP3RNA. After 48 h leaves were drop inoculated with 5 x 10<sup>4</sup> conidia ml<sup>-1</sup> of RNAi mutants.



241 Upon five days, infected leaves were scored for disease symptoms and harvested afterwards to  
242 measure the expression of the three fungal target genes by qPCR (Fig. 5). As revealed by  
243 reduced disease symptoms in treatments of leaves with CYP3RNA vs. TE (buffer control), a  
244 SIGS effects was retained in the IFA65 wt and the corresponding mutant  $\Delta qde3$ . All other  
245 mutants tested in this experiment were slightly or strongly compromised in SIGS: In  $\Delta ago1$ ,  
246  $\Delta ago2$ ,  $\Delta rdrp1$  there was no difference in the infection strength between CYP3RNA-treated vs.  
247 TE-treated mutants, while  $\Delta dcl1$ ,  $\Delta dcl2$  and  $\Delta qip1$  showed even higher infection upon  
248 CYP3RNA vs. TE treatment (Fig. 5 A). Consistent with this, strong down-regulation of all three  
249 *CYP51* target genes was observed only in the IFA65 wt and  $\Delta qde3$ , while mutants  $\Delta ago1$ ,  $\Delta ago2$ ,  
250  $\Delta rdrp1$ , showed some down-regulation of single *CYP51* genes. Moreover, in  $\Delta dcl1$ ,  $\Delta dcl2$  and  
251  $\Delta qip1$ , the inhibitory effect of CYP3RNA on *FgCYP51A*, *FgCYP51B* and *FgCYP51C*  
252 expression was completely abolished (Fig. 5B). To further substantiate this finding, we tested  
253 a *dcl1 dcl2* double mutant in *Fg* strain PH1. As anticipated from the experiments with the IFA65  
254 strain, the PH1 *dcl1 dcl2* mutant was fully compromised in SIGS (Fig. 5AB).  
255

256

## 257 **Discussion**

258 We generated a broad collection of KO mutants in RNAi genes in the necrotrophic, mycotoxin-  
259 producing pathogen *Fusarium graminearum* (*Fg*) to demonstrate their involvement in  
260 vegetative and generative growth, FHB development and mycotoxin production. While all  
261 RNAi mutants show normal vegetative development in axenic cultures, there were differences  
262 in pigments production in liquid potato extract glucose cultures. This suggests that in *F.*  
263 *graminearum* an RNAi pathway regulates the gene cluster responsible for the biosynthesis of  
264 pigments, including aurofusarin. Aurofusarin is a secondary metabolite belonging to the  
265 naphthoquinone group of polyketides (Medentsev et al., 1998; Samson et al., 2000) that shows  
266 antibiotic properties against filamentous fungi and yeast (Medentsev et al., 1993). The function  
267 of the compound in the fungus is unresolved as white mutants have a higher growth rate than  
268 the wt and are as pathogenic on wheat and barley (Malz et al., 2005). Overall, the contribution  
269 of the RNAi pathways to vegetative fungal development varies strongly among different fungi  
270 and must be considered case by case. For instance, while the growth of *dcl* and *ago* mutants of  
271 the entomopathogenic *Metarhizium robertsii* was not affected (Meng et al., 2017), DCL2, on  
272 the contrary, regulates vegetative growth in *Trichoderma atroviride* (Carreras-Villaseñor et al.,  
273 2013).

274 Under low light ( $< 2 \mu\text{mol m}^{-2} \text{s}^{-1}$ ) all RNAi mutants showed reduced conidia production and  
275 some also showed aberrant germination compared to IFA65 wt. This suggests that in absence  
276 of light induction the RNAi pathway is required for conidiation. RNAi may play a role in  
277 regulation of light responsive genes affecting conidiation as shown for *T. atroviride*, where  
278 DCL2 and RdRP3 control conidia production under light induction (Carreras-Villaseñor et al.,  
279 2013). The authors claimed that *Adcl2* and *Ardrp3* are impaired in perception and/or  
280 transduction of the light signal affecting the transcriptional response of light-responsive genes.  
281 *Metarhizium robertsii* DCL and AGO mutants show reduced abilities to produce conidia under  
282 light, though the light quantity was not described (Meng et al., 2017).

283 Perithecia development has been used to study sexual development and transcription of genes  
284 related to sexual development (Trail et al., 2000; Qi et al., 2006; Hallen et al., 2007). In field  
285 situations, ascospores serve as the primary inoculum for FHB epidemics because these spores  
286 are shot into the environment and can spread long distances (Maldonado-Ramirez et al., 2005).  
287 We found that all RNAi mutants could produce mature perithecia. However, corroborating and  
288 extending the exemplary work of Son et al. (2017), we also found that, beside *FgDCL1* and  
289 *FgAGO2*, other RNAi genes such as *RdRP1*, *RdRP2*, *RdRP3*, *RdRP4*, *QDE3*, *QIP* contribute

290 to the sexual reproduction. Mutations in these genes either showed severe defect in forcible  
291 ascospore discharge or significantly reduced germination. The Son et al. study showed that the  
292 mutants *Fgdcl1* and *Fgago2* were severely defective in forcible ascospore discharge, while  
293 *Fgdcl2* and *Fgago1* showed indistinguishable phenotypes compared to the wt (Son et al., 2017).  
294 Active roles for FgDCL1 and FgAGO2 was supported by the finding that expression levels of  
295 many genes, including those closely related to the mating-type (*MAT*)-mediated regulatory  
296 mechanism during the late stages of sexual development, were compromised in the respective  
297 mutants after sexual induction (Kim et al., 2015). Moreover, FgDCL1 and FgAGO2 primarily  
298 participated in the biogenesis of sRNAs and perithecia-specific miRNAs also were dependent  
299 on FgDCL1 (Zeng et al. 2018). Most of the produced sRNA originated from gene transcript  
300 regions and affected expression of the corresponding genes at a post-transcriptional level (Son  
301 et al., 2017). We show  
302 Here we show that, in addition to DCL1 and AGO2, also RdRP1, RdRP2, RdRP3, RdRP4, QIP  
303 and QDE3 are required for sex-specific RNAi, but further transcriptomic analysis and sRNA  
304 characterization are needed for a mechanistic explanation. Of note, ex-siRNA functions are  
305 important for various developmental stages and stress responses in the fungus *M. circinelloides*,  
306 while *F. graminearum* utilizes ex-siRNAs for a specific developmental stage. Thus, ex-siRNA-  
307 mediated RNAi might occur in various fungal developmental stages and stress responses  
308 depending on the fungal species.  
309 We investigated the involvement of RNAi in pathogenicity and FHB development by infecting  
310 wheat spikes of the susceptible cultivar Apogee with fungal conidia. At earlier time points of  
311 infection (9 dpi) clear differences between RNAi mutants were observed, though all mutants  
312 could spread within a spike and caused typical FHB symptoms at later time points (13 dpi).  
313 Despite full FHB symptom development in all mutants at 13 dpi, we observed various effects  
314 of fungal infection on the kernel morphology, corresponding to the different aggressiveness of  
315 mutants at early time points. Since this phenomenon may account for differences in producing  
316 mycotoxins during infection, we quantified mycotoxins in the kernels. Of not, the relative  
317 amount of DON [rDON] as calculated as [DON] per amount of fungal genomic DNA was  
318 reduced in virtually all spikes infected with RNAi mutants, whereby [rDON] was strongly  
319 reduced especially in spikes colonized with mutants  $\Delta ago1$ ,  $\Delta rdrp1$ ,  $\Delta rdrp2$ ,  $\Delta rdrp3$ ,  $\Delta rdrp4$   
320 and  $\Delta qde3$  as compared with wt IFA65 (Tab. 2). The data suggest that fungal RNAi pathways  
321 affect *Fg*'s DON production in wheat spikes. While [rDON] changed, the ratio of [DON] and  
322 [3A-DON] remain constant in all mutants vs. IFA65, suggesting that the fungal RNAi pathways  
323 do not affect the trichothecene chemotype.

324 In the present work, we also significantly extended the knowledge on the mechanism of SIGS-  
325 mediated control of plant diseases, a strategy, which might have great potential for more  
326 sustainable pesticide-reduced plant protections measures. We extended the earlier finding that  
327 DICER enzymes are required for gene silencing by hairpin or dsRNA in *Fusarium* (Chen et al.,  
328 2015; Koch et al., 2016). Of note, according to our data also AGO1 and AGO2 as well as QIP  
329 and RdRp1 are required for inhibiting *Fg* by exogenous dsRNA. More work is necessary to  
330 elucidate their specific roles in SIGS-mediated plant protection.

331 Taken together, our results further substantiate the involvement of RNAi pathways in  
332 conidiation, ascosporeogenesis and pathogenicity of *Fusarium graminearum*. Further studies  
333 could explore the biological roles of *Fg* RNAi genes in sRNA production and processing during  
334 different developmental stages.

335

336 **Methods:**

337

338 **Fungal material, generation of gene deletion mutants in *Fusarium graminearum* (*Fg*)**

339 The *Fg* strain PH1 and the PH1 *dcl1 dcl2* double mutant were a gift of Dr. Martin Urban,  
340 Rothamsted Research, England. RNAi gene deletion mutants were generated in the *Fg* strain  
341 IFA65 (Jansen et al. 2005). They were generated by homolog recombination using the pPK2  
342 binary vector. *Fg* RNAi genes were identified by blasting *Neurospora crassa* genes against the  
343 *Fusarium* genome sequence in the Broad institute data base. Disruption vectors were  
344 constructed by inserting two flanking fragments (~1000 bp) upstream and downstream the  
345 corresponding genes in the pPK2 vector as follows: *RdRP1*, *AGO1*, *QDE3*, *QIP*, *AGO2*, *DCL1*,  
346 *RdRP2*, *RdRP3*, *RdRP4* and *DCL2* upstream flanking sequences were inserted in the plasmid  
347 between PacI- KpnI restriction sites, and the downstream flanking sequence were inserted  
348 between XbaI- HindIII restriction sites. Except *AGO2* downstream flanking sequence was  
349 inserted in XbaI restriction site (primers used in disruption plasmid construction are listed in  
350 Table S1. Disruption vectors were introduced into *Agrobacterium* (LBA440 and AGL1 strains)  
351 by electroporation. A single colony of *Agrobacterium* containing the pPK2 plasmid were grown  
352 in 10 ml YEB medium (Vervliet et al., 1975) containing the appropriate antibiotics (5 µg/ml  
353 tetracycline + 25 µg/ml rifampicin + 50 µg/ml Kanamycin for LBA440, and 25 µg/ml  
354 carbenicillin + 25 µg/ml rifampicin + 50 µg/ml kanamycin for AGL1) and were incubated at  
355 28°C till OD<sub>600nm</sub> was reached 0.7. Then T-DNA was mobilized in *Agrobacterium* with 200 µM  
356 acetosyringone (Utermark et al., 2008), and the *Agrobacterium tumefaciens* and fungal recipient  
357 were co-cultivated on black filter paper (DP 551070, Albert LabScience, Hahnemühle, Dassel,  
358 Germany), respectively. Putative *Fg* IFA65 mutants were selected on potato extract glucose  
359 medium containing 150 µg/ml hygromycin + 150 µg/ml ticarcillin and grown for five days. For  
360 genotyping, genomic DNA of putative *Fusarium* mutants were extracted from mycelia.

361

362 **Genotyping of *Fusarium* mutants**

363 *Fg* IFA65 mutants were confirmed by genotyping using primers located in Hygromycin and  
364 corresponding genes flanking sequence (located after the cloned flanking sequence in the  
365 genome), and primers amplify parts of the genes (Table S2) and sequenced, respectively.  
366 Additionally, mRNA expression of the deleted gene in comparison to that in the wild type  
367 (IFA65 strain) was done by qRT-PCR using primers pairs listed in (Table S3). The mRNA  
368 transcripts were measured using 1 x SYBR Green JumpStart Taq Ready Mix (Sigma-Aldrich)  
369 according to manufacturer's instructions and assayed in 7500 Fast Real-Time PCR cyclor

370 (Applied Biosystems Inc, CA, USA) under the following thermal cycling conditions: initial  
371 activation step at 95 °C for 5 min, 40 cycles (95°C for 30 s, 53°C for 30 s, and 72°C for 30 s).  
372 The Ct values were determined with the software in the qRT-PCR instrument and the transcript  
373 levels of the genes was determined according to the  $2^{-\Delta\Delta C_t}$  method (Livak and Schmittgen, 2001).

374

### 375 **Colony morphology**

376 The RNAi mutants were cultured in plates of potato extract glucose (ROTH, Germany); starch  
377 agar and Synthetic Nutrient Agar (SNA) media (Leslie and Summerell, 2006). The plates were  
378 incubated at 25°C in 12h light/12h dark ( $52\mu\text{mol m}^{-2} \text{s}^{-1}$ , Philips Master TL-D HF 16W/840).  
379 The growth was documented after 5 days.

380

### 381 **Growth morphology in liquid medium**

382 Agar blocks from 2-week-old fungal cultures were incubated on liquid PEG medium for five  
383 days at RT, light ( $2\mu\text{mol m}^{-2} \text{s}^{-1}$ ) with shaking. Each mutant was grown in flask containing  
384 medium supplemented with hygromycin (100  $\mu\text{g/ml}$ ) and flask containing medium without  
385 hygromycin. Photos were taken to document the growth pattern after five days incubation.

386

### 387 **Production of fungal biomass**

388 Fifty milligram mycelia (fresh mycelia from four-day-old fungal cultures grown in Aspergillus  
389 Complete Medium (CM) plates in dark (Leslie and Summerell, 2006) were incubated in a 100  
390 ml flask containing 20 ml of PEG medium incubated at RT with shaking under 12 h light ( $2\mu\text{mol m}^{-2} \text{s}^{-1}$ ). Fungal mycelium was harvested after 3 days growth by filtration through filter  
391 paper (Munktell, AHLSTROM, Germany GMBH) and washed with distilled water twice and  
392 dried at 75°C overnight. The dry weight was calculated by using the following formula: Dry  
393 weight = (weight of filter paper + mycelium) - (weight of filter paper).

394

### 395 **Conidiation assay**

397 Production of conidia was done with slight modification (Yun et al., 2015). Four-day-old  
398 cultures of each mutant and IFA65 (wt) growing in CM agar plates in dark at 25°C were used  
399 for fresh mycelia preparation. The mycelia were scraped from plates surface using sterile  
400 toothpick, then 50 mg mycelia were inoculated in a 100 ml flask containing 20 ml of synthetic  
401 nutrient (SN) medium. The flasks were incubated at room temperature for 5 days in light ( $2\mu\text{mol m}^{-2} \text{s}^{-1}$ )  
402 in a shaker (100 rpm). Subsequently, the conidia produced from each mutant and



403 wild type was counted using a hemocytometer (Fuchs Rosenthal, Superior Marienfeld,  
404 Germany).

405  
406 **Viability test of conidia**

407 Fourteen mL from the same cultures used in conidiation assay was centrifuged in 4,000 rpm for  
408 10 min to precipitate conidia, and then the conidia was resuspended in 5 ml 2% sucrose water  
409 and incubated in dark for 2 days at 23°C. The germinated and non-germinated ascospores were  
410 visualized and counted under an inverse microscope. Conidia germination rate was determined  
411 as percentage of germinated conidia of the total conidia number.

412  
413 **Perithecia production and ascospore discharge assay**

414 Fungi were grown on carrot agar prepared under bright fluorescent light at room temperature  
415 (18-24°C) for five days (Klittich and Leslie, 1988). Then the aerial mycelia were removed with  
416 a sterile tooth stick. To stimulate sexual reproduction and perithecia formation, one ml of 2.5%  
417 Tween 60 was applied to the plates with a sterile glass rod after scraping the mycelia (Cavinder  
418 et al., 2012). The plates were incubated under fluorescent light at RT for nine days.  
419 Subsequently, agar blocks (1.5 cm in diameter) were cut from the plates containing the mature  
420 perithecia using a cork borer. Agar blocks were sliced in half, placed on glass microscope slides,  
421 and incubated in boxes under high humidity for two days under 24 h light ( $52 \mu\text{mol m}^{-2} \text{s}^{-1}$   
422 Philips Master TL-D HF 16W/840). During this time, ascospores discharged from the perithecia  
423 accumulated on the slide. For the quantification of discharged ascospores, slides were washed  
424 off by 2 ml of an aqueous Tween 20 (0.002%) solution and counted using a hemocytometer.

425  
426 **Viability test of the discharged ascospores**

427 Mycelia with mature perithecia (13 days after sexual induction) on carrot agar were incubated  
428 in a humid box at room temperature under lights for 4 days according to (Son et al., 2017). The  
429 discharged ascospores were washed from plates cover using SN liquid medium and were  
430 incubated in dark for 24 h in a humid box. The germinated and non-germinated ascospores were  
431 visualized under an inverse microscope and counted.

432  
433 **Pathogenicity assay on wheat ears**

434 The susceptible wheat cultivar Apogee was used. Plants were grown in an environmentally  
435 controlled growth chamber (24°C, 16 h light,  $180 \mu\text{mol m}^{-2} \text{s}^{-1}$  photon flux density, 60% rel.  
436 humidity) till the anthesis. Point inoculations to the second single floret of each spike were

437 performed at mid-anthesis with 5  $\mu$ L of a 40,000 conidia/mL suspension amended with 0.002%  
438 v/v Tween 20 (Gosman et al., 2010).

439 Control plants were inoculated with sterile 0.002% v/v Tween 20. For each *Fg* genotype, ten  
440 wheat heads were inoculated and incubated in plastic boxes misted with water to maintain high  
441 humidity for two days. Then incubation continued at 22°C at 60% rel. humidity. Infected wheat  
442 heads were observed 11 and 13 dpi and infection percentage was determined as the ratio of  
443 infected spikelets to the total spikelet number per ear.

444

#### 445 **Thousand Grain Weight (TGW) of infected wheat kernels**

446 Hundred kernels from two biological experiments with 10 wheat heads point-inoculated with  
447 wt IFA65 and mutants were counted and weighed. TGW was calculated in grams per 1000  
448 kernels of cleaned wheat seeds.

449

#### 450 **Quantification of fungal DNA in infected wheat kernels**

451 Fungal genomic DNA in kernels was quantified using qPCR as described (Brandfass and  
452 Karlovsky, 2008). Dried grains were ground. DNA was extracted from 30 mg flour and  
453 dissolved in 50  $\mu$ l of TE buffer. One  $\mu$ l of 50x diluted DNA was used as template for real-time  
454 PCR with primers amplifying 280 bp fragment specific for *F. graminearum*. The PCR mix  
455 consisted of reaction buffer (16 mM (NH<sub>4</sub>)<sub>2</sub>SO<sub>4</sub>, 67 mM Tris-HCl, 0.01% Tween-20, pH 8.8 at  
456 25°C; 3 mM MgCl<sub>2</sub>, 0.3  $\mu$ M of each primer, 0.2 mM of each dATP, dTTP, dCTP and dGTP  
457 (Bioline), 0.03 U/ $\mu$ l Taq DNA polymerase (Bioline, Luckenwalde, Germany) and 0.1x SYBR  
458 Green I solution (Invitrogen, Karlsruhe, Germany). The PCR was performed in CFX384  
459 thermocycler (BioRad, Hercules, CA, USA) according to the following cycling condition:  
460 Initial denaturation 2 min at 95°C, 35 cycles with 30 s at 94°C, 30 s at 61°C, 30 s at 68°C, and  
461 final elongation for 5 min at 68°C. No matrix effects were detectable with 50-fold diluted DNA  
462 extracted from grains. Standards were prepared from pure *Fg* DNA in 3-fold dilution steps from  
463 100 pg to 0.4 pg/well.

464

#### 465 **Analysis of mycotoxins in infected wheat kernels**

466 The content of mycotoxins in wheat kernels infected with *Fg* RNAi mutants and wild type strain  
467 IFA65 was determined using high performance liquid chromatography coupled to tandem mass  
468 spectrometry (HPLC-MS/MS). Mycotoxins were extracted from ground grains with mixture  
469 containing 84% acetonitrile, 15% water and 1% acetic acid and the extracts were defatted with  
470 cyclohexane. Chromatographic separation was carried out on a C18 column eluted with a

471 water/methanol gradient and the analytes were ionized by electrospray and detected by MS/MS  
472 in multiple reaction monitoring (MRM) mode essentially as described (Sulyok et al., 2006).

473

#### 474 **Spray application of dsRNA on barley leaves**

475 Second leaves of 3-week-old barley cultivar Golden Promise were detached and transferred to  
476 square Petri plates containing 1% water-agar. dsRNA spray applications and leaf inoculation  
477 was done virtually as described (Koch et al. 2016). For the TE-control, TE-buffer was diluted  
478 in 500  $\mu$ l water corresponding to the amount used for dilution of the dsRNA. Typical RNA  
479 concentration after elution was 500 ng  $\mu$ l<sup>-1</sup>, representing a buffer concentration of 400  $\mu$ M Tris-  
480 HCL and 40  $\mu$ M EDTA in the final dilution. TE buffer were indistinguishable from treatments  
481 with control dsRNA generated from the GFP or GUS gene, respectively (Koch et al., 2016;  
482 Koch et al., 2018). Thus, we used TE buffer as control to save costs. Spraying of the leaves was  
483 carried out in the semi-systemic design (Koch et al. 2016), where the lower parts of the detached  
484 leaf segments were covered by a tinfoil to avoid direct contact of dsRNA with the leaf surface  
485 that was subsequently inoculated.

486

#### 487 **Statistics and analysis**

488 Data obtained from two or three repetitions were subjected to the Student's *t* test in Microsoft  
489 office Excel 2010. Significance was determined as  $P \leq 0.05$ , 0.01 or 0.001 and indicated by \*,  
490 \*\* or \*\*\*, respectively. Unless specified otherwise, data are presented as mean  $\pm$  standard error  
491 or mean  $\pm$  standard deviation of the mean. Sequence analysis was performed on the ApE  
492 plasmid editor free tool. Basic Local Alignment Search Tool (BLAST) NCBI BLAST  
493 (<http://blast.ncbi.nlm.nih.gov/Blast.cgi>) was used for sequences search and alignment.

494

#### 495 **List of abbreviations**

496

497 AGO, Argonaute

498 CYP51, *Cytochrome P450 lanosterol C-14 $\alpha$ -demethylase*

499 DCL, Dicer-like

500 DON, deoxynivalenol

501 *Fg*, *Fusarium graminearum*

502 FHB, *Fusarium* head blight

503 HIGS, host-induced gene silencing

504 hpRNA, hairpin RNA

505 MSUD, meiotic silencing by unpaired DNA

506 NIV, nivalenol

507 PEG, potato extract glucose

508 QDE 2,3, Quelling defective 2,3

509 QIP, QDE-interacting protein

510 RdRp, RNA-dependent RNA polymerase

511 RISC, RNA-dependent silencing complex,

512 RNAi, RNA interference

513 RPA, subunit of replication protein A

514 siRNA, small interfering RNA

515 SNA, synthetic nutrient agar

516 ssDNA, single-stranded

517 TGW, thousand grain weight

518

519 **Declarations**

520 **Ethics approval and consent to participate**

521 Not applicable

522 **Consent for publication**

523 Not applicable

524 **Availability of data and material**

525 All data generated or analysed during this study are included in this published article [and its  
526 supplementary information files].

527 **Competing interests**

528 The authors declare that they have no competing interests" in this section.

529 **Funding**

530 This research was supported by the German Research Council (DFG) to K.-H. K in the project  
531 GRK2355

532 **Authors' contributions**

533 FYG and JI conducted the experimental work; JI and KHK designed the research and wrote the  
534 manuscript. PK conducted the experiments related to *Fg* mycotoxins.

535

536 **Acknowledgements**

537 We thank Mrs. E. Stein for excellent technical assistance, Dr. A. Rathgeb for mycotoxin  
538 analysis and Ms. C. Birkenstock for caring of the plants. The *Fg* strain PH1 and the PH1 *dcl1*  
539 *dcl2* double mutant were a kind gift of Dr. Martin Urban, Rothamsted Research, England.

540 **Legends to figures**

541

542 **Fig. 1. PCR verification of targeted gene replacement in *Fusarium graminearum*. (A)**

543 Amplification of an internal part of the targeted genes *DCL1*, *DCL2*, *AGO1*, *AGO2*, *RdRP1*,  
544 *RdRP4*, *RdRP2*, *RdRP3*, *QIP*, and *QDE3* are positive in the IFA65 (wt) strain and negative in  
545 corresponding mutants. **(B)** PCR with primer pairs in the right recombination sequence and  
546 hygromycin, showing that the antibiotic resistance gene had integrated into the target gene  
547 locus. PCR products were analyzed on 1.5% agarose gel electrophoresis. M; DNA marker. wt;  
548 wild type.

549

550 **Fig. 2. The RNAi pathway is required for asexual development of *Fusarium graminearum***  
551 **in the absence of inductive light. (A)** Number of conidia produced: Means± SEs of the

552 percentage of conidia numbers from three repeated experiments. Significant differences are  
553 marked: \*P, 0.05, \*\*P, 0.01, \*\*\*P, 0.001 (Student's *t* test). **(B)** Percent of conidial germination:  
554 Means± SEs of the percentage of germinated spores from three biological repetitions.  
555 Significant differences are marked: \*P, 0.05 (Student's *t* test). **(C)** Microscopic observation of  
556 germinated and non-germinated conidia of IFA65 (wt) and *Δrdrp4*. Imaging after 48 h  
557 incubation in dark, scale bar: 50 μm. Black arrow; conidia forming a bipolar germ tube. Red  
558 arrow; conidia forming multiple germ tubes.

559

560 **Fig. 3. Forcible ascospore discharge in *Fusarium graminearum* RNAi mutants and wt**

561 **strain IFA65. (A)** Forcible ascospore firing. Half circular carrot agar blocks covered with  
562 mature perithecia were placed on glass slides. Photos from forcibly fired ascospores (white  
563 cloudy) were taken after 48 h incubation in boxes under high humidity and fluorescent light.  
564 **(B)** Fired ascospores were washed off and counted. Means± SDs of the counted spores is  
565 presented from three biological repetitions. Significant differences are marked: \*P, 0.05, \*\*\*P,  
566 0.001 (Student's *t* test). **(C)** Ascospore germination. Discharged ascospores were incubated at  
567 100% relative humidity in the dark for 24 h at 23°C in SN liquid medium. The percentage of  
568 germination was assessed by examining the ascospore number in three random squares in the  
569 counting chamber. Means± SEs of the percentage of germinated spores from three biological  
570 repetitions. Significant differences are marked: \*P, 0.05 (Student's *t* test).

571

572 **Fig. 4. Infection of wheat spikes with *Fusarium graminearum* RNAi mutants and wt strain**

573 **IFA65. (A)** Representative samples of spikes at 9 and 13 dpi. One spikelet at the bottom of each



574 spike (red arrow) was point inoculated with 5  $\mu$ l of 0.002% Tween 20 water containing 40,000  
575 conidia / mL. The assay was repeated two times with 10 spikes per fungal genotype and  
576 experiment. **(B)** Wheat kernels 13 dpi with *Fg* RNAi mutants and wt strain IFA65.

577

578 **Fig. 5 Infection symptoms of *Fg* RNAi mutants on barley leaves sprayed with**

579 **CYP3RNA. A.** Detached leaves of 3-week-old barley plants were sprayed with 20 ng  $\mu$ l<sup>-1</sup>  
580 CYP3RNA or TE buffer, respectively. After 48 h, leaves were drop-inoculated with 5 x 10<sup>4</sup>  
581 conidia ml<sup>-1</sup> of indicated *Fg* RNAi mutants and evaluated for infection symptoms at 5 dpi.  
582 Values show relative infection area as calculated from TE- vs. CYP3RNA-treated plants for  
583 each RNAi mutant with 10 leaves and three biological repetitions. Asterisks indicate statistical  
584 significant reduction of the infection area on CYP3RNA- vs. TE-treated plants measured by  
585 ImageJ for each mutant (\*\*p<0,01; \*\*\*p< 0,001; students t-test). The *dcl1 dcl2* double mutant  
586 is generated in *Fg* strain PH1. **(B).** Downregulation of the three *CYP51* genes in *Fg* mutants  
587 upon colonization of CYP3RNA- vs. TE-treated barley leaves. Strong down-regulation of all  
588 three *CYP51* genes is only observed in both *Fg* wild-types and in the mutant  *$\Delta$ qde3*. Asterisks  
589 indicate statistical significant downregulation of *CYP51* genes on CYP3RNA vs. TE-treated  
590 plants. (\*\*p<0,01; \*\*\*p< 0,001; students t-test). Error bars indicate SE of three independent  
591 experiments in A and B.

592

593 **References**

594 Alexander, W.G., Raju, N.B., Xiao, H., Hammond, T.M., Perdue, T.D., Metzenberg, R.L., et al. (2008).  
595 DCL-1 colocalizes with other components of the MSUD machinery and is required for silencing. *Fungal*  
596 *Genet Biol.* 45(5):719-727.

597 Audenaert, K., Vanheule, A., Höfte, M., Haesaert, G. (2014). Deoxynivalenol: A Major Player in the  
598 Multifaceted Response of *Fusarium* to Its Environment. *Toxins* (Basel). doi: 10.3390/toxins6010001.

599 Bai, Y., Lan, F., Yang, W., Zhang, F., Yang, K., Li, Z. et al. (2015). sRNA profiling in *Aspergillus*  
600 *flavus* reveals differentially expressed miRNA-like RNAs response to water activity and temperature.  
601 *Fungal Genet Biol.* 81:113-119.

602 Baulcombe, D.C. (2013). Small RNA—the Secret of Noble Rot. *Science*. doi: 10.1126/science.1245010.

603 Brandfass, C., and Karlovsky, P. (2008). Upscaled CTAB-Based DNA Extraction and Real-Time PCR  
604 Assays for *Fusarium culmorum* and *F. graminearum* DNA in Plant Material with Reduced Sampling  
605 Error. *Int J Mol Sci.*;doi: 10.3390/ijms9112306.

606 Brown, N., Evans, A.J., Mead, A., and Hammond-Kosack, K.E. (2017). A spatial temporal analysis of  
607 the *Fusarium graminearum* transcriptome during symptomless and symptomatic wheat infection. *Mol*  
608 *Plant Pathol* 18 (9).

609 Cai, Q., He, B., Kogel, K.H., and Jin, H. (2018). Cross-kingdom RNA trafficking and environmental  
610 RNAi — nature’s blueprint for modern crop protection strategies. *Curr Opin Microbiol.*  
611 doi:10.1016/j.mib.2018.02.003.

- 612 Calo, S., Nicolás, F.E., Vila, A., Torres-Martínez, S., and Ruiz-Vázquez, R.M. (2012). Two distinct  
613 RNA-dependent RNA polymerases are required for initiation and amplification of RNA silencing in the  
614 basal fungus *Mucor circinelloides*. *Mol Microbiol.* 83.
- 615 Campo, S., Gilbert, K.B., and Carrington, J.C. (2016). Small RNA-based antiviral defense in the  
616 phytopathogenic fungus *Colletotrichum higginsianum*. *PLoS Pathog.* doi:  
617 10.1371/journal.ppat.1005640.
- 618 Carreras-Villaseñor, N., Esquivel-Naranjo, E.U., Villalobos-Escobedo, J.M., Abreu-Goodger, C., and  
619 Herrera-Estrella, A. (2013). The RNAi machinery regulates growth and development in the filamentous  
620 fungus *Trichoderma atroviride*. *Mol Microbiol.* doi:10.1111/mmi.12261.
- 621 Cavinder, B., Sikhakolli, U., Fellows, K.M., Trail, F. (2012). Sexual development and ascospore  
622 discharge in *Fusarium graminearum*. *J Vis Exp.* doi: 10.3791/3895.
- 623 Chang SS, Zhang Z, and Liu Y. (2012). RNA interference pathways in fungi: mechanisms and functions.  
624 *Annu Rev Microbiol.* 66.
- 625 Chen., Y, Gao, Q., Huang, M., Liu, Y., Liu, Z, Liu X., and Ma, Z. (2015). Characterization of RNA  
626 silencing components in the plant pathogenic fungus *Fusarium graminearum*. *Sci Rep.* doi:  
627 10.1038/srep12500.
- 628 Cogoni C, and Macino G. (1999). Gene silencing in *Neurospora crassa* requires a protein homologous  
629 to RNA-dependent RNA polymerase. *Nature.* 399(6732):166-9.
- 630 Cuomo, C.A., Güldener, U., Xu, J.R., Trail, F., Turgeon, B.G., Di Pietro A., et al. (2007). The *Fusarium*  
631 *graminearum* genome reveals a link between localized polymorphism and pathogen specialization.  
632 *Science.* 317.
- 633 Dalakouras A, Wassenegger M, McMillan J.N., Cardoza V., Maegele, I, Dadami E., Runne M, Krczal  
634 G and Wassenegger MK (2016). Induction of Silencing in Plants by High-Pressure Spraying of *In vitro*-  
635 Synthesized Small RNAs. *Front. Plant Sci.*, doi.org/10.3389/fpls.2016.01327
- 636 Dang Y, Yang Q, Xue Z, and Liu Y. (2011). RNA Interference in Fungi: Pathways, Functions, and  
637 Applications. *Eukaryot. Cell.* 10.
- 638 Dean, R., Van Kan, J.A., Pretorius, Z.A., Hammond-Kosack K.E., Di Pietro, A., Spanu, P.D., Rudd,  
639 J.J., Dickman, M., Kahmann, R., Ellis J., and Foster G.D. (2012). The top 10 fungal pathogens in  
640 molecular plant pathology. *Mol Plant Pathol.* doi: 10.1111/j.1364-3703.2011.00783.x.
- 641 Desjardins AE, Hohn TM, and McCormick SP. (1993). Trichothecene biosynthesis in *Fusarium* species:  
642 Chemistry, genetics and significance. *Microbiol Rev.* 57.
- 643 Dill-Macky R, and Jones RK. (2000). The effect of previous crop residues and tillage on *Fusarium* head  
644 blight of wheat. *Plant Dis.* 2000;84.
- 645 Fire A, Xu, S, Montgomery, MK, Kostas, SA, Driver, SE, and Mello, CC. (1998). Potent and specific  
646 genetic interference by double-stranded RNA in *Caenorhabditis elegans*. *Nature.* 391.
- 647 Frandsen, R.J., Nielsen, N.J., Maolanon, N., Sørensen, J.C., Olsson, S., Nielsen, J., and Giese, H. (2006).  
648 The biosynthetic pathway for aurofusarin in *Fusarium graminearum* reveals a close link between the  
649 naphthoquinones and naphthopyrones. *Mol Microbiol.* 61(4).
- 650 Gosman, N., Steed, A., Chandler, E., Thomsett, M., Nicholson, P. (2010). Evaluation of type I fusarium  
651 head blight resistance of wheat using non-deoxynivalenol-producing fungi. *Plant Pathology* 147 (59).
- 652 Hallen H, Huebner M, Shiu SH, Guldener U, and Trail F. (2007). Gene expression shifts during  
653 perithecial development in *Gibberella zeae* (anamorph *Fusarium graminearum*), with particular  
654 emphasis on ion transport proteins *Fungal Genet Biol.* 44.
- 655 Hammond, S.M. (2005). Dicing and slicing: the core machinery of the RNA interference pathway. *FEBS*  
656 *Lett.* 579 (26).

- 657 Harris, L.J, Balcerzak, M., Johnston, A., Schneiderman, D., and Ouellet, T. (2016). Host-preferential  
658 *Fusarium graminearum* gene expression during infection of wheat, barley, and maize. *Fungal Biol.* 120  
659 (1).
- 660 Ilgen, P., Hadel, B., Maier, F.J., and Schäfer, W. (2009). Developing kernel and rachis node induce  
661 the trichothecene pathway of *Fusarium graminearum* during wheat head infection. *Mol Plant Microbe*  
662 *Interact.* 22.
- 663 Jansen, C., von Wettstein, D., Schäfer, W., Kogel, K.H., Felk, F., and Maier, F.J. (2005). Infection  
664 patterns in barley and wheat spikes inoculated with wild type and trichodiene synthase gene disrupted  
665 *Fusarium graminearum*. *Proc. Nat. Acad. Sci USA.* 102.
- 666 Kim, HK, Jo, SM, Kim, GY, Kim DW, Kim, YK, and Yun, SH. (2015). A large-scale functional analysis  
667 of putative target genes of mating-type loci provides insight into the regulation of sexual development  
668 of the cereal pathogen *Fusarium graminearum*. *PLoS Genet.* 11.
- 669 Klittich, C.J.R, and Leslie, J.F. (1988). Nitrate reduction mutants of *Fusarium moniliforme* (*Gibberella*  
670 *fujikuroi*). *Genetics.* 118.
- 671 Koch, A., Biedenkopf, D., Furch, A., Weber, L., Rossbach O., Abdellatef E., Linicus, L., Johannsmeier,  
672 J., Jelonek, L., Goesmann, A., Cardoza V., McMillan, J., Mentzel, T., and Kogel, K.H. (2016). An  
673 RNAi-Based Control of *Fusarium graminearum* infections through spraying of Long dsRNAs involves  
674 a plant passage and is controlled by the fungal silencing machinery. *PLoS Pathog*  
675 doi:10.1371/journal.ppat.1005901.
- 676 Koch, A., and Kogel, K.H. (2014). New wind in the sails: improving the agronomic value of crop plants  
677 through RNAi-mediated gene silencing. *Plant Biotechnol J.* doi: 10.1111/pbi.12226.
- 678 Koch, A., Kumar, N., Weber, L., Keller, H., Imani, J., and Kogel, K.H. (2013). Host-induced gene  
679 silencing of cytochrome P450 lanosterol C14 $\alpha$ -demethylase-encoding genes confers strong resistance  
680 to *Fusarium* species. *Proc Natl Acad Sci U S A.* doi: 10.1073/pnas.1306373110.
- 681 Koch A, Stein E, and Kogel KH (2018). RNA-based disease control as a complementary measure to  
682 fight *Fusarium* fungi through silencing of the Azole target cytochrome P450 lanosterol C-14  $\alpha$ -  
683 demethylase. *Eu. J Plant Pathol.* DOI 10.1007/s10658-018-1518-4.
- 684 Kusch, S., Frantzeskakis, L., Thieron, H., and Panstruga, R. (2018). Small RNAs from cereal powdery  
685 mildew pathogens may target host plant genes. *Fungal Biol.* doi.org/10.1016/j.funbio.2018.08.008.
- 686 Lau, S.K., Tse, H., Chan, J.S., Zhou, A.C., Curreem, S.O., Lau, C.C., Yuen, K.Y., and Woo, P.C. (2013).  
687 Proteome profiling of the dimorphic fungus *Penicillium marneffei* extracellular proteins and  
688 identification of glyceraldehyde-3-phosphate dehydrogenase as an important adhesion factor for  
689 conidial attachment. *FEBS J.* doi: 10.1111/febs.12566.
- 690 Lee, D.W., Pratt, R.J., McLaughlin, M., and Aramayo, R. (2003). An Argonaute-like protein is required  
691 for meiotic silencing. *Genetics.*164.
- 692 Leslie, J.F., Summerell, B.A. (2006) *The Fusarium laboratory manual.* Blackwell Professional, Ames,  
693 IA, USA; .
- 694 Livak, K.J., Schmittgen, T.D. (2001). Analysis of relative gene expression data using real-time  
695 quantitative PCR and the  $2^{-\Delta\Delta C(T)}$  Method. *Methods.* 25 (4).
- 696 Maldonado-Ramirez SL, Schmale DG, Jr Shields EJ, Bergstrom GC. (2005). The relative abundance of  
697 viable spores of *Gibberella zeae* in the planetary boundary layer suggests the role of long-distance  
698 transport in regional epidemics of *Fusarium* head blight. *Agric For Meteorol.* doi:  
699 10.1016/j.agrformet.2005.06.007.
- 700 Malz, S., Grell, M.N., Thrane, C., Maier, F.J., Rosager, P., Felk, A., Albertsen, K.S., Salomon, S., Bohn  
701 L., Schäfer, W., and Giese, H. (2005). Identification of a gene cluster responsible for the biosynthesis  
702 of aurofusarin in the *Fusarium graminearum* species complex. *Fungal Genet Biol.*  
703 doi:10.1016/j.fgb.2005.01.010.

- 704 McLoughlin, A.G., Wytinck, N., Walker, P.L., Girard, I.J., Rashid, K.Y., de Kievit, T., Dilantha, W.G.  
705 Fernando, Whyard, S. and Belmonte, M.F. (2018) Identification and application of exogenous dsRNA  
706 confers plant protection against *Sclerotinia sclerotiorum* and *Botrytis cinerea*. *Scientific Reports* 8:7320  
707 DOI:10.1038/s41598-018-25434-4.
- 708 Medentsev, A.G., Kotik, A.N., Trufanova, V.A., and Akimenko, V.K. (1993). Identification of  
709 aurofusarin in *Fusarium graminearum* isolates, causing a syndrome of worsening of egg quality in  
710 chickens. *Prikl Biokhim Mikrobiol.* 29.
- 711 Mello, C.C., and Conte, D, Jr. (2004). Revealing the world of RNA interference. *Nature* 431.
- 712 Meng, H, Wang, Z, Wang, Y, Zhu, H and Huang, B. (2017). Dicer and Argonaute genes involved in  
713 RNA interference in the entomopathogenic fungus *Metarhizium robertsii*. *Appl. Environ. Microbiol.*  
714 doi: 10.1128/AEM.0323016.
- 715 Nguyen, Q., Iritani, A., Ohkita, S., Vu, B.V., Yokoya, K., Matsubara, A., Ikeda, K.I., Suzuki, N.,  
716 Nakayashiki, H. (2018). A fungal Argonaute interferes with RNA interference. *Nucleic Acids Res.*  
717 16;46(5).
- 718 Nowara, D., Gay, A., Lacomme, C., Shaw, J., Ridout, C., Douchkov, D., Hensel, G., Kumlehn, J., and  
719 Schweizer, P. (2010). HIGS: Host-induced gene silencing in the obligate biotrophic fungal pathogen  
720 *Blumeria graminis*. *Plant Cell.* doi: <https://doi.org/10.1105/tpc.110.077040>.
- 721 Qi, W., Kwon C., and Trail, F. (2006). Microarray analysis of transcript accumulation during  
722 perithecium development in *Gibberella zeae* (anamorph *Fusarium graminearum*). *Mol Genet Genomics*  
723 276(1):87-100.
- 724 Raman, V., Simon, S.A., Demirci, F., Nakano, M., Meyers, B.C., and Donofrio, N.M. (2017) Small  
725 RNA functions are required for growth and development of *Magnaporthe oryzae*. *Mol Plant Microbe*  
726 *Interact.* 30(7).
- 727 Romano, N., and Macino, G. (1992). Quelling: transient inactivation of gene expression in *Neurospora*  
728 *crassa* by transformation with homologous sequences. *Mol Microbiol.*6.
- 729 Samson, R.A., Frisvad, J.C., Hoekstra, E.S. (2000). *Introduction to Food- and Airborne Fungi*, 6th edn.  
730 Utrecht, NL: Centraalbureau voor Schimmelcultures.
- 731 Segers, G.C., Zhan, g X., Deng, F., Sun, Q., Nuss, D.L. (2007). Evidence that RNA silencing functions  
732 as an antiviral defense mechanism in fungi. *Proc Natl Acad Sci USA.* 104.
- 733 Shiu, P.K., Raju, N.B., Zickler, D., Metzberg, R.L. (2001). Meiotic silencing by unpaired DNA. *Cell.*  
734 107.
- 735 Son, H., Min, K., Lee, J., Raju, N.B., and Lee, Y.W. (2011). Meiotic silencing in the homothallic fungus  
736 *Gibberella zeae*. *FUNGAL BIOL-UK.* 115.
- 737 Son, H., Park, A.R., Lim, J.Y., Shin, C., and Lee, Y.W. (2017). Genome-wide exonic small interference  
738 RNA-mediated gene silencing regulates sexual reproduction in the homothallic fungus *Fusarium*  
739 *graminearum*. *PLoS Genet.* doi.org/10.1371/journal.pgen.1006595.
- 740 Song, M.S., and Rossi, J.J. (2017). Molecular mechanisms of Dicer: endonuclease and enzymatic  
741 activity. *Biochem J.* 474(10).
- 742 Sulyok, M., Berthiller, F., Krska, R., and Schuhmacher, R. (2006). Development and validation of a  
743 liquid chromatography/tandem mass spectrometric method for the determination of 39 mycotoxins in  
744 wheat and maize. *Rapid Commun Mass Spectrom.* 20.
- 745 Torres-Martínez, S., and Ruiz-Vázquez, R.M. (2017). The RNAi universe in fungi: A varied landscape  
746 of small RNAs and biological functions. *Annu Rev Microbiol.* 71.
- 747 Trail, F., and Common, R. (2000). Perithecial development by *Gibberella zeae*: a light microscopy  
748 study. *Mycologia.* 92.

- 749 Urban, M., King, R., Hassani-Pak, K., and Hammond-Kosack, K.E. (2015). Whole-genome analysis of  
750 *Fusarium graminearum* insertional mutants identifies virulence associated genes and unmask untagged  
751 chromosomal deletions. BMC Genomics. doi: 10.1186/s12864-015-1412-9.
- 752 Utermark, J., and Karlovsky, P. (2008). Genetic transformation of filamentous fungi by *Agrobacterium*  
753 *tumefaciens*. Nat. Protoc. 2008; doi:10.1038/nprot.2008.83.
- 754 Vervliet, G., Holsters, M., Teuchy, H., Van Montagu, M., and Schell, J. (1975). Characterization of  
755 different plaque-forming and defective temperate phages in *Agrobacterium* strains. J Gen Virol. 26.
- 756 Wang, S., Li P., Zhang, J., Qiu, D., and Guoa, L. (2016). Generation of a high resolution map of sRNAs  
757 from *Fusarium graminearum* and analysis of responses to viral infection. Scientific Reports. doi:  
758 10.1038/srep26151.



759 Wang, M., Weiberg, A., Lin, F.M., Thomma, B.P., Huang, H.D., and Jin, H. (2016). Bidirectional cross-  
 760 kingdom RNAi and fungal uptake of external RNAs confer plant protection. *Nature plants* 2, 16151.  
 761 Weiberg A, Wang M, Lin F-M, Zhao H, Zhang Z, et al. Fungal Small RNAs Suppress Plant Immunity  
 762 by Hijacking Host RNA Interference Pathways. *Science*. 2013;doi: 10.1126/science.1239705.  
 763 Yun Y, Liu Z, Yin Y, Jiang J, Chen Y, Xu JR, Ma Z. Functional analysis of the *Fusarium graminearum*  
 764 phosphatome. *New Phytol*. 2015; doi: 10.1111/nph.13374.  
 765 Zanimi S, Šečić E, Jelonek L, Kogel KH (2018) A bioinformatics pipeline for the analysis and target  
 766 prediction of RNA effectors in bidirectional communication during plant-microbe interactions. *Front*.  
 767 *Plant Sci*. doi: 10.3389/fpls.2018.01212.  
 768 Zeng W., Wang J, Wang Y, Lin J, Fu Y, Xie J, Jiang D, Chen T, Liu H and Cheng J. (2018) Dicer-Like  
 769 Proteins Regulate Sexual Development via the Biogenesis of Perithecium-Specific MicroRNAs in a  
 770 Plant Pathogenic Fungus *Fusarium graminearum*. *Frontiers in Microbiology*. doi:  
 771 10.3389/fmicb.2018.00818  
 772 Zhang H, Xia R, Meyers BC, Walbot V. Evolution, functions, and mysteries of plant ARGONAUTE  
 773 proteins. *Curr Opin Plant Biol*. 2015;27.  
 774 **Table 1:** RNAi pathway genes of *Fusarium graminearum* (*Fg*) as identified from  
 775 www.Broadinstitute.org and used in this study.

776

| RNAi proteins in <i>Neurospora crassa</i>                                  | Homologs in <i>Fg</i> | aa identity (%) | Fusarium gene ID | Gene function in <i>Fg</i>                                                                                                                                                                                                                                                   |
|----------------------------------------------------------------------------|-----------------------|-----------------|------------------|------------------------------------------------------------------------------------------------------------------------------------------------------------------------------------------------------------------------------------------------------------------------------|
| DICER1                                                                     | <i>FgDCL1</i>         | 43%             | FGSG_09025       | Antiviral defence (Wang et al., 2016).<br>Minor role in processing of exogenous dsRNA, hpRNA or pre-miRNA in mycelium (Chen et al., 2015).<br>Major role in sex-specific RNAi pathway: Production of regulatory sRNAs. Required for ascospore production (Son et al., 2017). |
| DICER2                                                                     | <i>FgDCL2</i>         | 35%             | FGSG_04408       | Processing of exogenous dsRNA, hpRNA and pre-miRNA in mycelium (Chen et al., 2015).<br>Partially shared DCL-1 role in production of regulatory sRNAs in the sexual stage (Son et al., 2017).                                                                                 |
| ARGONAUTE1<br>(syn. Quelling defective 2)                                  | <i>FgAGO1</i>         | 59%             | FGSG_08752       | Major component in the RISC during quelling (Chen et al., 2015).                                                                                                                                                                                                             |
| ARGONAUTE2<br>(syn. Suppressor of meiotic silencing2, SMS2)                | <i>FgAGO2</i>         | 43%             | FGSG_00348       | Minor role in binding siRNA derived from exogenous dsRNA, hpRNA or pre-miRNA in mycelium (Chen et al., 2015).<br>Major role in sex-specific RNAi pathway; required for ascospore production (Son et al., 2017).                                                              |
| RNA-dependent RNA polymerase<br>(syn. Quelling defective1)                 | <i>FgRdRP1</i>        | 38%             | FGSG_06504       | Maybe associated with secondary sRNA production (Chen et al., 2015).                                                                                                                                                                                                         |
|                                                                            | <i>FgRdRP4</i>        | 33%             | FGSG_04619       | Maybe associated with secondary sRNA production [40].                                                                                                                                                                                                                        |
| RNA dependent RNA polymerase<br>(syn. Suppressor of ascus dominance, SAD1) | <i>FgRdRp2</i>        | 42%             | FGSG_08716       | Maybe associated with secondary sRNA production (Chen et al., 2015).                                                                                                                                                                                                         |
|                                                                            | <i>FgRdRp5</i>        | 29 %            | FGSG_09076       | Roles in the antiviral defence [65].<br>Maybe associated with secondary sRNA production (Chen et al., 2015).                                                                                                                                                                 |
| RNA-dependent RNA polymerase (RRP3)                                        | <i>FgRdRP3</i>        | 47%             | FGSG_01582       | Maybe associated with secondary sRNA production (Chen et al., 2015).                                                                                                                                                                                                         |



|                          |               |     |            |                                                                                       |
|--------------------------|---------------|-----|------------|---------------------------------------------------------------------------------------|
| QDE2-interacting protein | <i>FgQIP</i>  | 32% | FGSG_06722 | The homolog has been identified in (Chen et al., 2015), but not yet studied in depth. |
| RecQ helicase QDE3       | <i>FgQDE3</i> | 46% | FGSG_00551 | not studied                                                                           |

777

778 **Table 2:** Tricothecenes produced by RNAi mutants in infected wheat kernels at 13 dpi.  
779

| Samples                   | ng <i>Fg</i> DNA /mg seed d.w. | DON [mg/kg seed] | DON/DNA | <sup>1</sup> A-DON [mg/kg seed] | <sup>2</sup> A-DON/DON x1000 |
|---------------------------|--------------------------------|------------------|---------|---------------------------------|------------------------------|
| Mock (without <i>Fg</i> ) | 0                              | 0.00             | 0       | 0                               | 0                            |
| $\Delta$ <i>ago1</i>      | 0.84                           | 12.7             | 15.2    | 0.45                            | 36                           |
| $\Delta$ <i>ago2</i>      | 1.28                           | 32.3             | 25.2    | 1.04                            | 32                           |
| $\Delta$ <i>dcl1</i>      | 2.86                           | 61.9             | 21.6    | 1.87                            | 30                           |
| $\Delta$ <i>dcl2</i>      | 2.03                           | 56.6             | 27.9    | 1.89                            | 33                           |
| $\Delta$ <i>rdrp1</i>     | 4.84                           | 86.7             | 17.9    | 3.51                            | 40                           |
| $\Delta$ <i>rdrp2</i>     | 0.95                           | 16.9             | 17.8    | 0.43                            | 25                           |
| $\Delta$ <i>rdrp3</i>     | 0.78                           | 12.3             | 15.6    | 0.35                            | 29                           |
| $\Delta$ <i>rdrp4</i>     | 0.47                           | 4.90             | 10.3    | 0.15                            | 31                           |
| $\Delta$ <i>qip</i>       | 2.53                           | 68.7             | 27.2    | 2.87                            | 42                           |
| $\Delta$ <i>qde3</i>      | 4.33                           | 82.3             | 19.0    | 3.91                            | 47                           |
| IFA wt                    | 2.18                           | 78.3             | 35.9    | 2.58                            | 33                           |

780  
781 DON, deoxynivalenol; A-DON, acetyldeoxynivalenol  
782 <sup>1</sup> 3A-DON (3-acetyldeoxynivalenol) and 15A-DON (15-acetyldeoxynivalenol) were measured  
783 <sup>2</sup> Ratio of concentrations of A-DON and DON, multiplied by 1000  
784  
785

786 **Supplement data:**

787

788

789 **Supplement figures**

790

791 **Figure S1:**

792 **Schematic representation of the gene replacement strategy used for *Fusarium***  
793 ***graminearum* transformation.** Yellow box: the target gene that has to be replaced by KO; dark  
794 green box: selection marker gene, in this case the antibiotic resistance gene (*hygromycin B*  
795 *phosphotransferase* of *E. coli*, *hph*). Blue arrow: Homologous recombination sequences,  
796 typically ~1 kb long; Black arrows: template area for primers binding used for transformants  
797 genotyping. PgpdA: Promoter region of the *Glyceraldehyde-3-phosphate dehydrogenase* gene  
798 of *Aspergillus nidulans*; TtrpC: termination region of the *Aspergillus nidulans trpC* gene.

799

800

801 **Fig. S2. Compromised expression of deleted RNAi genes in *Fusarium graminearum***  
802 **knockout (KO) mutants.** Expression of the targeted genes in respective *Fusarium* mutants.  
803 Transcript levels were analyzed by qRT-PCR from five-day-old PEG liquid cultures and  
804 transcript quantified by normalization to *Fusarium β-Tubulin (FgTub)* or *Elongation factor a*  
805 (*FgEF1a*) and comparison to wt IFA65

806

807

808 **Figure S3. Colony morphology and growth of RNAi knock-out (KO) mutants.** *Fusarium*  
809 mutants and the wt IFA65 were grown for 5 days on solid (A) PDA (potato dextrose agar), (B)  
810 SN (synthetic nutrient), (C) CM (*Aspergillus* complete medium) and in liquid PEG medium  
811 without hygromycin. The mutants showed differences in pigmentation as follows: *Δagol*,  
812 *Δrdrp2*, *Δrdrp3* and *Δrdrp4* darker pigmentation; *Δdcl1*, *Δdcl2* and *Δrdrp1* reduced  
813 pigmentation compared to wt.

814

815

816 **Fig. S4. Infection of wheat spikes with *Fusarium graminearum* RNAi mutants and wt**  
817 **strain IFA65.** Thousand grain weight (TGW) of infected wheat spikes. Mock control: Kernels  
818 treated with 0.002% Tween 20; mature kernels: completely mature Apogee kernels.

(A)

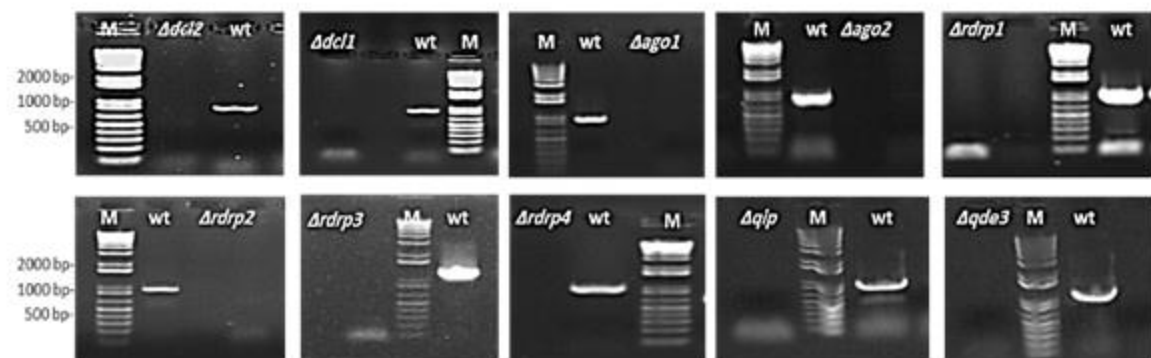

(B)

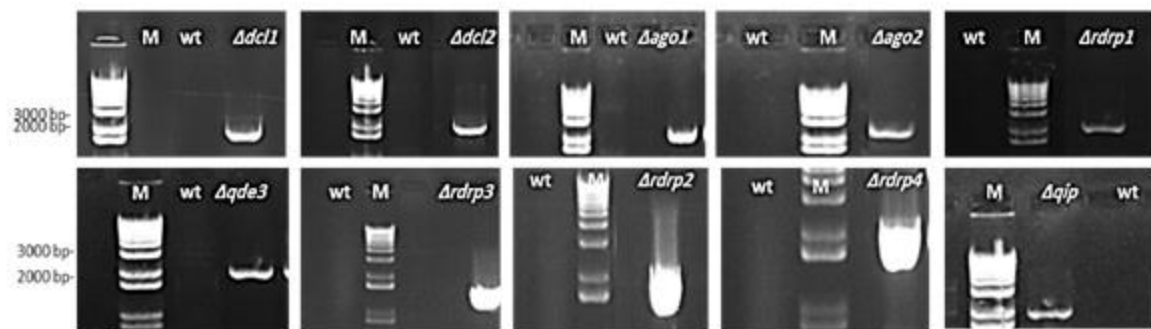

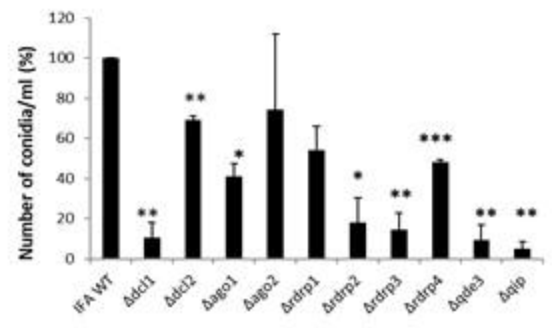

(A)

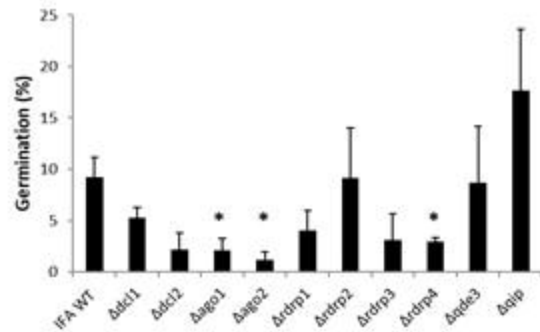

(B)

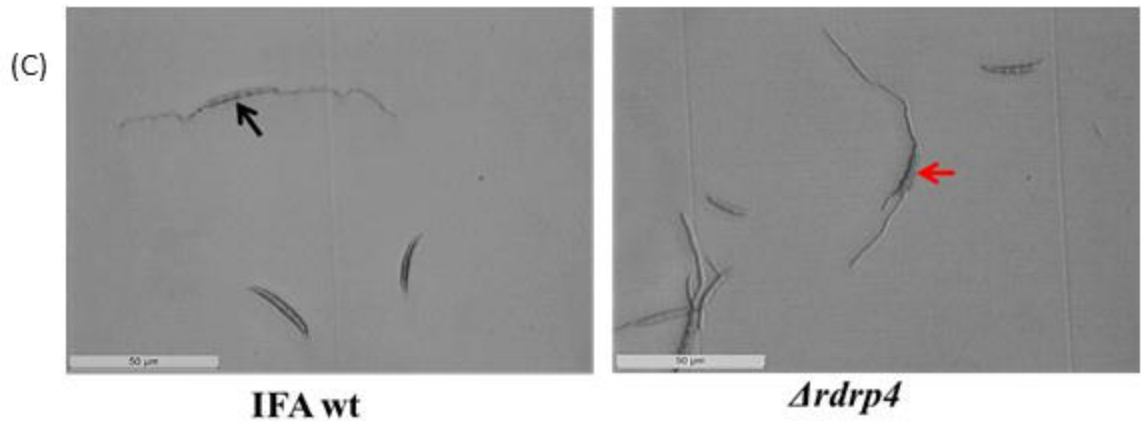

Fig. 2

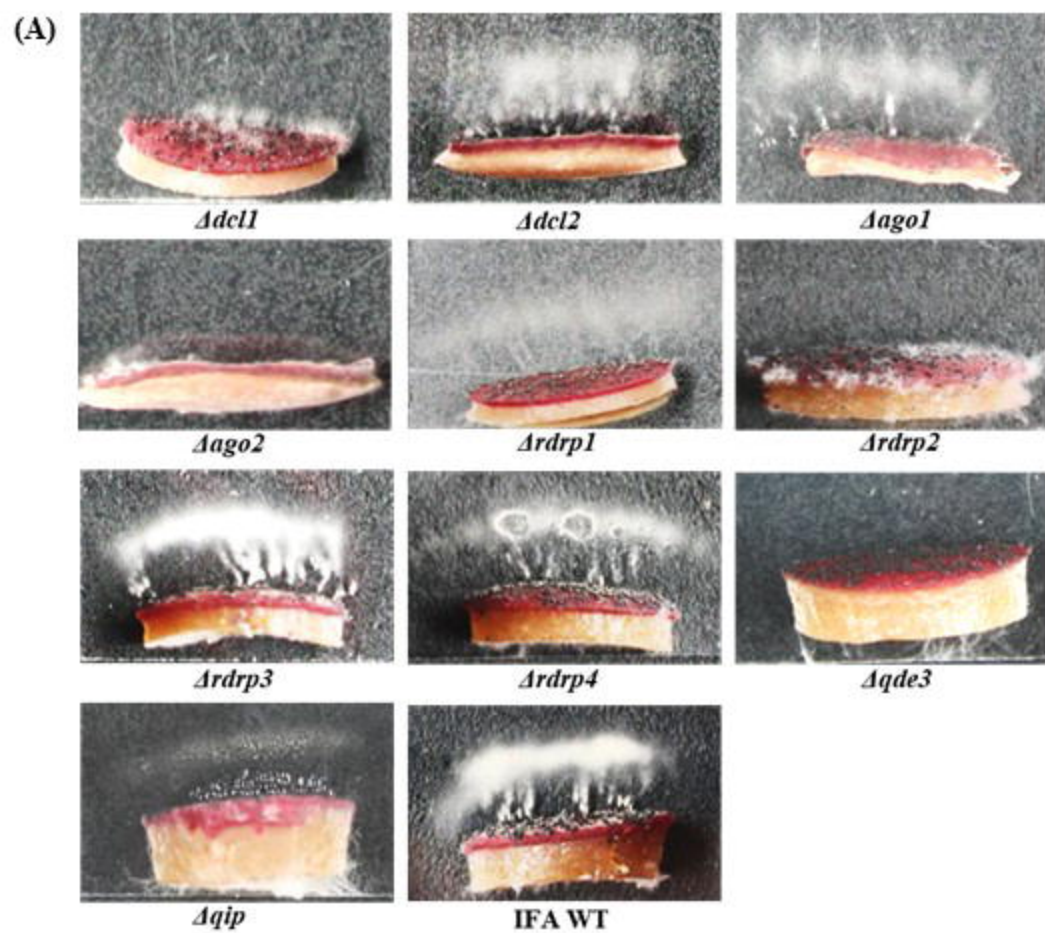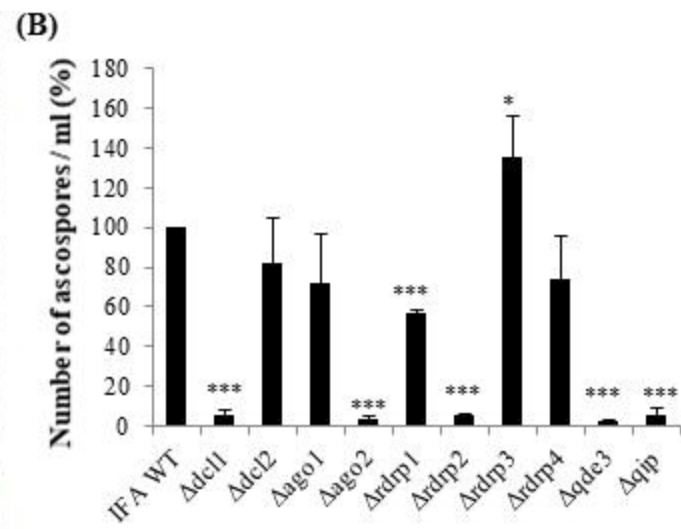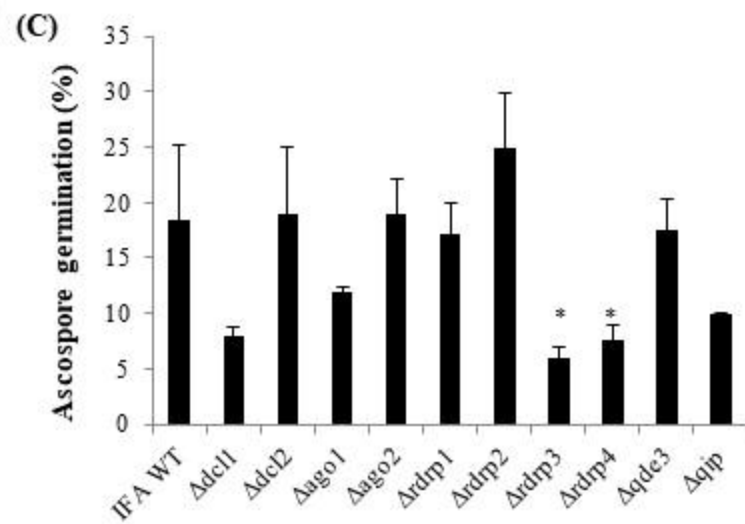

Fig. 3



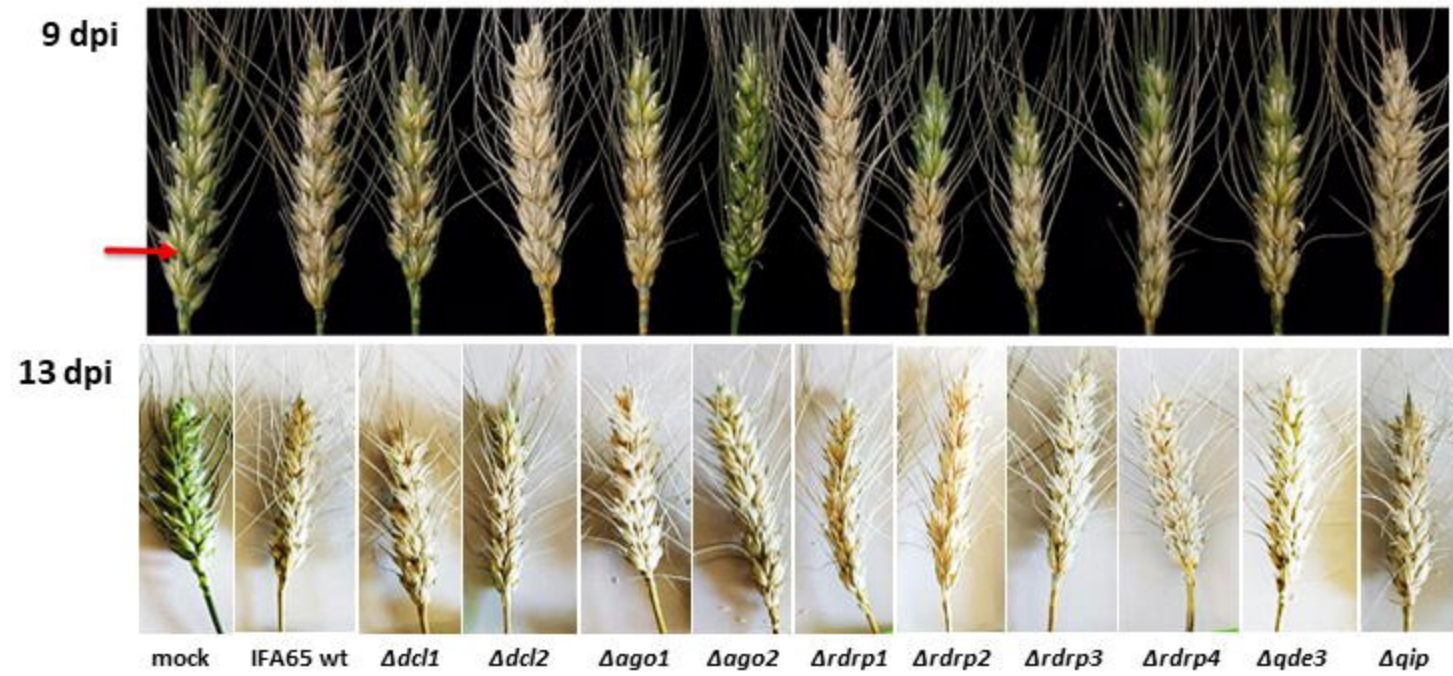

Fig. 4

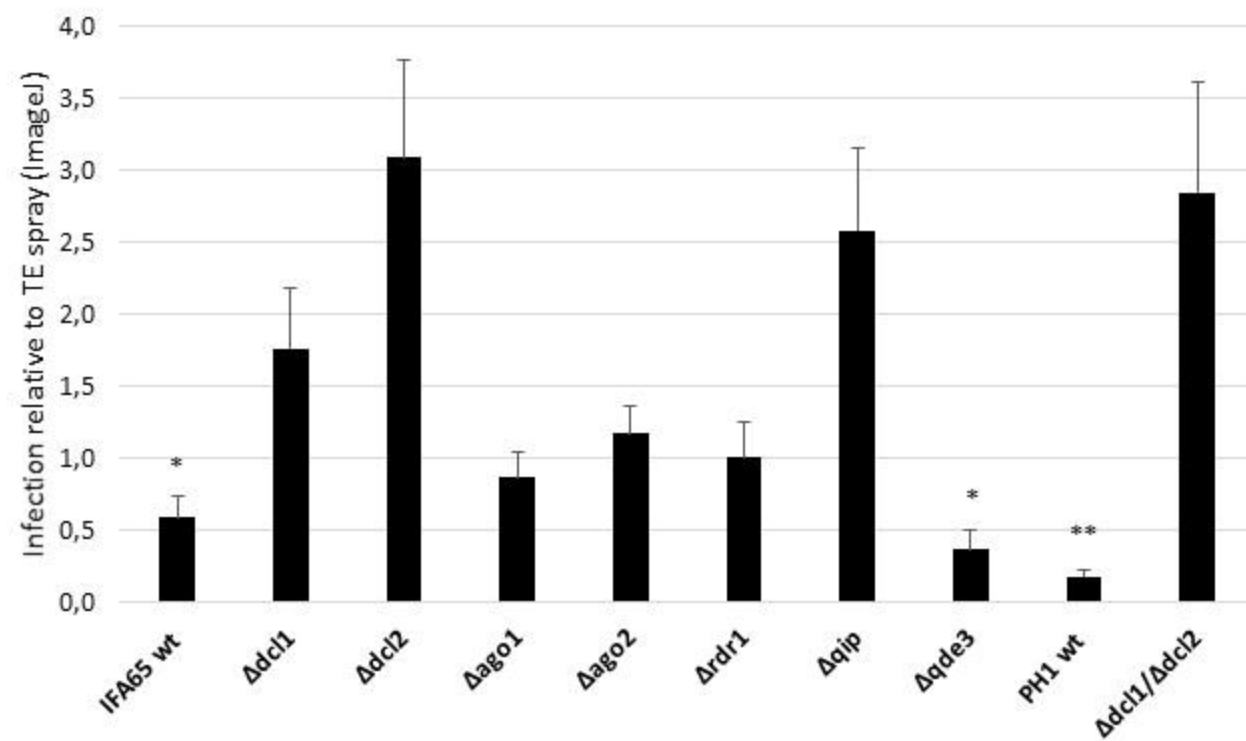

Fig. 5A

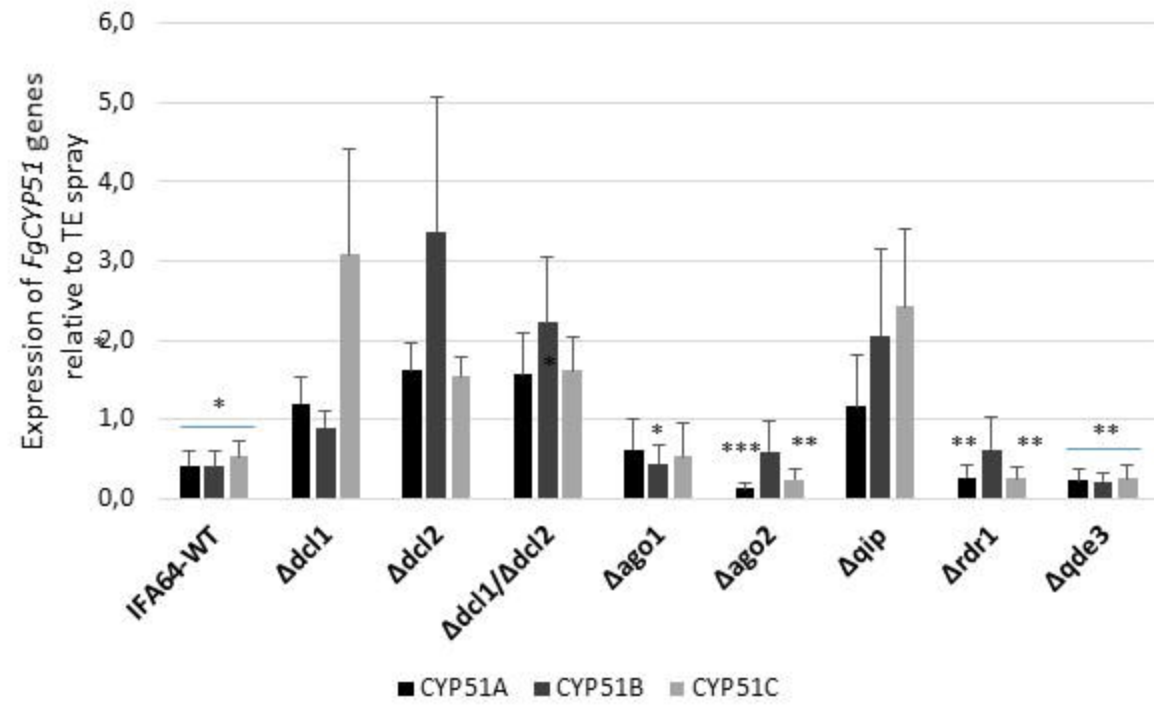

Fig. 5B
