1           **Different components of the RNAi machinery are required for conidiation,**  
2           **ascosporogenesis, virulence, DON production and fungal inhibition by exogenous**  
3           **dsRNA in the Head Blight pathogen *Fusarium graminearum***

4  
5  
6 Fatima Yousif Gaffar<sup>1†</sup>, Jafargholi Imani<sup>1†</sup>, Petr Karlovsky<sup>2</sup>, Aline Koch<sup>1</sup>, Karl-Heinz Kogel<sup>1</sup>

7  
8 <sup>1</sup>Department of Phytopathology, Centre for BioSystems, Land Use and Nutrition, Justus Liebig  
9 University, Heinrich-Buff-Ring 26, D-35392, Giessen, Germany

10 <sup>2</sup>Department of Crop Sciences, Molecular Phytopathology and Mycotoxin Research, University  
11 of Goettingen, D-37077 Goettingen, Germany

12 Email addresses:

13 Fatima.Y.Gaffar@agrار.uni-giessen.de

14 [Jafargholi.Imani@agrار.uni-giessen.de](mailto:Jafargholi.Imani@agrار.uni-giessen.de)

15 pkarlov@gwdg.de

16 [Aine.Koch@agrار.uni-giessen.de](mailto:Aine.Koch@agrار.uni-giessen.de)

17 Karl-Heinz.Kogel@agrار.uni-giessen.de

18  
19 \*Correspondence to Karl-Heinz.Kogel@agrار.uni-giessen.de

20 † Contributed equally to this work.

21

22 **Abstract:**

23 Gene silencing through RNA interference (RNAi) shapes many biological processes in  
24 filamentous fungi, including pathogenicity. In this study we explored the requirement of key  
25 components of fungal RNAi machinery, including DICER-like 1 and 2 (*FgDCL1*, *FgDCL2*),  
26 ARGONAUTE 1 and 2 (*FgAGO1*, *FgAGO2*), AGO-interacting protein *FgQIP* (QDE2-  
27 interacting protein), RecQ helicase (*FgQDE3*), and four RNA-dependent RNA polymerases  
28 (*FgRdRP1*, *FgRdRP2*, *FgRdRP3*, *FgRdRP4*), in the ascomycete mycotoxin-producing fungal  
29 pathogen *Fusarium graminearum* (*Fg*) for sexual and asexual multiplication, pathogenicity,  
30 and its sensitivity to double-stranded (ds)RNA. We corroborate and extend earlier findings that  
31 conidiation, ascosporeogenesis and Fusarium Head Blight (FHB) symptom development require  
32 an operable RNAi machinery. The involvement of RNAi in conidiation is dependent on  
33 environmental conditions as it is detectable only under low light ( $< 2 \mu\text{mol m}^{-2} \text{s}^{-1}$ ). Although  
34 both DCLs and AGOs partially share their functions, the sexual ascosporeogenesis is mediated  
35 primarily by *FgDCL1* and *FgAGO2*, while *FgDCL2* and *FgAGO1* contribute to asexual  
36 conidia formation and germination. *FgDCL1* and *FgAGO2* also account for pathogenesis as  
37 their knock-out (KO) results in reduced FHB development. Apart from KO mutants  $\Delta dcl2$  and  
38  $\Delta ago1$ , mutants  $\Delta rdrp2$ ,  $\Delta rdrp3$ ,  $\Delta rdrp4$ ,  $\Delta qde3$  and  $\Delta qip$  are strongly compromised for  
39 conidiation, while KO mutations in all *RdPRs*, *QDE3* and *QIP* strongly affect ascosporeogenesis.  
40 Analysis of trichothecenes mycotoxins in wheat kernels showed that the relative amount of  
41 deoxynivalenol (DON), calculated as [DON] per amount of fungal genomic DNA, was reduced  
42 in all spikes infected with RNAi mutants, suggesting the possibility that the fungal RNAi  
43 pathways affect *Fg*'s DON production in wheat spikes. Moreover, gene silencing by exogenous  
44 target gene specific dsRNA (spray-induced gene silencing, SIGS) is dependent on fungal DCLs,  
45 AGOs, and QIP, but not on QDE3. Together these data show that in *F. graminearum* different  
46 key components of the RNAi machinery are crucial in different steps of fungal development  
47 and pathogenicity.

48

49 **Introduction:**

50 RNA interference (RNAi) is a conserved mechanism triggered by double-stranded (ds)RNA  
51 that mediates resistance to exogenous nucleic acids, regulates the expression of protein-coding  
52 genes on the transcriptional and post-transcriptional level and preserves genome stability by  
53 transposon silencing (Fire et al., 1998; Mello and Conte, 2004; Hammond, 2005; Baulcombe  
54 2013). Many reports have demonstrated that this natural mechanism for sequence-specific gene  
55 silencing also holds promise for experimental biology and offers practical applications in  
56 functional genomics, therapeutic intervention, and agriculture (Nowara et al., 2010; Koch and  
57 Kogel, 2014; Cai et al., 2018; Zanini et al., 2018). Core RNAi pathway components are  
58 conserved in eukaryotes, including most parasitic and beneficial fungi (Cogoni and Macino,  
59 1999; Dang et al., 2011; Carreras-Villaseñor et al., 2013; Torres-Martínez and Ruiz-Vázquez,  
60 2017): DICER-like (DCL) enzymes, which belong to the RNase III superfamily, generate  
61 double-stranded small interfering (si)RNAs and micro (mi)RNAs (Meng et al., 2017; Song and  
62 Rossi, 2017); ARGONAUTE (AGO) superfamily proteins bind small RNA duplexes to form  
63 an RNA-induced silencing complex (RISC) for transcriptional and post-transcriptional gene  
64 silencing (PTGS) (Zhang et al., 2015; Nguyen et al., 2018); and RNA-dependent RNA  
65 polymerases (RdRPs) are involved in the production of dsRNA that initiate the silencing  
66 mechanism as well as in the amplification of the silencing signals through the generation of  
67 secondary siRNAs (Calo et al., 2012).

68 Fungal RNAi pathways contribute to genome protection (Meng et al., 2017), pathogenicity  
69 (Weiberg et al., 2013; Kusch et al., 2018; Zanini et al. 2019), development (Carreras-Villaseñor  
70 et al., 2013), and antiviral defense (Segers et al., 2007; Campo et al., 2016; Wang et al., 2016a).  
71 In *Aspergillus flavus* (Bai et al., 2015), *Magnaporthe oryzae* (Raman et al., 2017) and  
72 *Penicillium marneffei* (Lau et al., 2013), sRNAs were shown to be responsive to environmental  
73 stress. In *Trichoderma atroviride*, both light-dependent asexual reproduction and light-  
74 independent hyphal growth require an operational RNAi machinery (Carreras-Villaseñor et al.,  
75 2013). Similarly, in *Mucor circinelloides*, defects in the RNAi machinery resulted in various  
76 developmental defects such as dysfunction during sexual and asexual reproduction (Torres-  
77 Martínez and Ruiz-Vázquez, 2017).

78 *Neurospora crassa*, a model organism for studying RNAi in filamentous fungi, has different  
79 silencing pathways, including quelling (Romano et al., 1992) and meiotic silencing by unpaired  
80 DNA (MSUD) (Shiu et al., 2001). In the vegetative stage, the introduction of transgenes results  
81 in PTGS of the transgenes and cognate endogenous mRNAs, an RNAi silencing phenomenon  
82 known as quelling. The process requires *QDE3* (*Quelling defective 3*), which encodes a RecQ

83 helicase, and RPA (subunit of replication protein A), which recognizes aberrant DNA  
84 structures. Interaction of these proteins recruits Quelling defective 1 (QDE1), a protein with  
85 dual function as DNA-dependent RNA polymerase (DdRP) and RdPR, to the single-stranded  
86 (ss)DNA locus, resulting in production of aberrant ssRNAs and its conversion to dsRNAs.  
87 Subsequently the dsRNA is processed into small RNAs by DCL1. sRNAs duplexes are loaded  
88 onto QDE2 (Quelling defective 2), which encodes an AGO homolog. QDE2 cleaves the  
89 passenger strand and the exonuclease QIP (QDE2-interacting protein) assists to remove it to  
90 form an active RISC that targets complementary mRNA for degradation (Chang et al., 2012).  
91 MSUD occurs during sexual development in prophase I of meiosis, when unpaired homologous  
92 DNA sequences have been detected during the pairing of the homologous chromosomes, which  
93 then also leads to the production of aberrant RNA transcripts (Chang et al., 2012). Genes  
94 required for MSUD are *SAD1* (*Suppressor of ascus dominance 1*), a paralog of QDE-1, and  
95 *SAD2*. *SAD2* recruits *SAD1* to the perinuclear region, where aberrant RNA is converted to  
96 dsRNA. Upon silencing by DCL1, the small RNA duplexes are loaded onto *SMS2* (Suppressor  
97 of meiotic silencing 2), an AGO homolog in *Neurospora*, which also is assisted by QIP. In  
98 contrast, QDE-2 and DCL2 are not required for MSUD in *Neurospora*, indicating that there  
99 are two parallel RNAi pathways functioning separately in the vegetative and meiotic stages.

100 *Fusarium graminearum* (*Fg*) is one of the devastating pathogens of cereals causing Fusarium  
101 Head Blight (FHB) and Crown Rot (FCR) (Dean et al., 2012; Harris et al., 2016). The pathogen  
102 belongs to the filamentous ascomycetes. Ascospores are the primary inoculum for FHB  
103 epidemics as these spores are forcibly shot into the environment and also can pass long  
104 distances (Maldonado-Ramirez et al., 2005). Moreover, the sexual development ensures the  
105 formation of survival structures necessary for overwintering (Dill-Macky and Jones, 2000) and  
106 the genetic diversity of the population (Cuomo et al. 2007). Of note, spike infections can be  
107 symptomless or symptomatic (Urban et al., 2015; Brown et al., 2017). In both cases, *Fusarium*  
108 fungi contaminate the grain with mycotoxins and thus decrease grain quality. Among the  
109 mycotoxins, the B group trichothecenes, including deoxynivalenol (DON), nivalenol (NIV),  
110 and their acetylated derivatives (3A-DON, 15A-DON, and 4A-NIV) influence the virulence of  
111 the fungus (Ilgen et al., 2009; Desjardins et al., 1993; Jansen et al., 2005). Mycotoxins such as  
112 DON trigger an oxidative burst in the host plants, resulting in cell necrosis and disintegration  
113 of the defense system, which then favors colonization of the plant tissues by a necrotrophic  
114 fungus (Audenaert et al., 2014). Importantly, *Fg* possesses a functional MSUD mechanism (Son  
115 et al., 2011) and *AGO* genes *FgSMS2* or *FgAGO2* are necessary for sexual reproduction (Kim  
116 et al., 2015). A recent work discovered that the sex-induced RNAi mechanism has important

117 roles in sexual reproduction (Son et al., 2017). siRNAs produced from exonic gene regions (ex-  
118 siRNAs) participate in PTGS at a genome-wide level in the late stages of sexual reproduction.  
119 The sex-specific RNAi pathway is primarily governed by *FgDCL1* and *FgAGO2*. Thus, *Fg*  
120 primarily utilizes ex-siRNA-mediated RNAi for ascospore formation. Consistent with the key  
121 role of *FgDCL1* in generative development, the combination of sRNA and transcriptome  
122 sequencing predicted 143 novel microRNA-like RNAs (milRNAs) in wild-type perithecia, of  
123 which most were depended on *FgDCL1*. Given that 117 potential target genes were predicted,  
124 these perithecium-specific milRNAs may play roles in sexual development (Zeng et al., 2018).  
125 To develop RNAi-based plant protection strategies such as host-induced gene silencing (HIGS)  
126 (Koch et al. 2013) and spray-induced gene silencing (SIGS) (Koch et al., 2016; Koch et al.  
127 2018) against *Fusarium* species, it is required to bank on knowledge about the RNAi  
128 components involved in *Fusarium* development and pathogenicity. A report of Chen and  
129 colleagues (Chen et al., 2015) demonstrated that, in *Fg*, a hairpin RNA (hpRNA) can  
130 efficiently silence the expression level of a target gene, and that the RNAi components  
131 *FgDCL2* and *FgAGO1* are required for silencing. This finding is consistent with reports  
132 showing that a *Fg* wild-type (wt) strain, but not *Fg* RNAi mutants, are amenable to SIGS-  
133 mediated target gene silencing, when it grows on a plant sprayed with exogenous dsRNA  
134 directed against the fungal *Cytochrome P450 lanosterol C-14 $\alpha$ -demethylase (CYP51)* genes  
135 (Koch et al., 2016). In this study, we expanded previous studies to address the requirement of  
136 an extended set of *Fg* RNAi genes in growth, reproduction, virulence, toxin production, and  
137 SIGS-mediated inhibition of fungal infection of barley leaves.  
138

139 **Results:**

140 **Requirement of RNAi pathway core components under different light regimes**

141 The *Fg* genome obtained from the Broad Institute ([www.broadinstitute.org](http://www.broadinstitute.org)) contains many  
142 functional RNAi machinery components (Chen et al., 2015; Son et al., 2017). We generated *Fg*  
143 gene replacement mutants for several major RNAi genes by homolog recombination using the  
144 pPK2 binary vector (**Table 1**). Disruption vectors for *FgDCL1*, *FgDCL2*, *FgAGO1*, *FgAGO2*,  
145 *FgRdRP1*, *FgRdRP2*, *FgRdRP3*, *FgRdRP4*, *FgQDE3*, and *FgQIP* were constructed by  
146 inserting two flanking fragments (~1000 bp) upstream and downstream of the corresponding  
147 genes in pPK2 vector (**Table S1; Figure S1**). The vectors were introduced into *Agrobacterium*  
148 *tumefaciens*, followed by agro-transformation of the *Fg* strain IFA. Transformants were  
149 transferred to Petri dishes of potato extract glucose (PEG) medium, containing 150 µg/ml  
150 hygromycin and 150 µg/ml ticarcillin. Mutants were verified by PCR analysis with genomic  
151 DNA as template (**Figure 1**) and by expression analysis of the respective RNAi gene (Fig. S2).  
152 Colony morphology of PCR verified mutants (12h/12h light/dark, see methods) was inspected  
153 in axenic cultures of three different media, PEG, synthetic nutrient (SN) agar and starch agar  
154 (SA). In the PEG agar medium, all mutants showed slightly reduced radial growth, while there  
155 were no clear differences as compared with the IFA wild type (WT) WT strain in SN and SA  
156 media (**Figures S3 A-C**). In liquid PEG medium under day light conditions, all mutants  
157 produced comparable amounts of mycelium biomass, though different amounts of the red  
158 pigment aurofusarin (Frandsen et al., 2006): *Δdcl1*, *Δdcl2*, *Δrdrp1*, *Δqde3*, and *Δqip1* showed  
159 reduced pigmentation, while *Δago1*, *Δrdrp2*, *Δrdrp3*, and *Δrdrp4* showed higher pigmentation  
160 compared to IFA WT (**Figure S3 D; Table 2**). Under light induction conditions (12 h light; 52  
161 µmol m<sup>-2</sup> s<sup>-1</sup>), conidia grown in 96-well-plate liquid SN cultures showed normal germ tube  
162 emergence (not shown). All RNAi mutants formed an elongated hyphal cell type, producing  
163 abundant conidia on conidiophores and directly from hyphae. Conidia were moderately curved  
164 with clear septations.

165 When grown continuously under dimmed light (2 µmol m<sup>-2</sup> s<sup>-1</sup>), liquid SN cultures of RNAi  
166 mutants showed significantly reduced conidiation compared to IFA WT, except *Δago2* and  
167 *Δrdrp1*, which were only slightly affected (**Figure 2 A**). Under this non-inductive condition,  
168 some RNAi mutants also were compromised in conidial germination: *Δago1*, *Δago2* and *Δrdrp4*  
169 showed significantly reduced germination, while *Δrdrp3*, *Δdcl1*, *Δrdrp1* and *Δdcl2* showed a  
170 slight reduction, and *rdrp2*, *Δqip* and *Δqde3* showed normal conidial germination (**Figure 2 B**;  
171 see **Table 2**). All RNAi mutants had a normal germ tube morphology, except *Δrdrp4*, which  
172 tends to develop multiple germ tubes (**Figure 2 C**). These results suggest a requirement for *Fg*



173 RNAi components genes in the full control of asexual development depending on the  
174 environmental conditions.

175

### 176 ***F. graminearum* RNAi components are required for sexual development**

177 Because there were contrasting data in the literature, we resumed asking the question of whether  
178 RNAi components are required for sexual reproduction of *Fg*. Perithecia (fruiting bodies)  
179 formation was induced in axenic cultures on carrot agar (Cavinder et al., 2012). All RNAi  
180 mutants produced melanized mature perithecia to the same extend as compared to IFA WT (not  
181 shown). Next, we assessed the forcible discharge of ascospores by a spore discharge assay  
182 (**Figure 3**). Discharge of ascospores from perithecia into the environment results from turgor  
183 pressure within the asci; the dispersal of ascospores by forcible discharge is a proxy for fungal  
184 fitness as it is important for dissemination of the disease. To this end, half circular agar blocks  
185 covered with mature perithecia were placed on glass slides and images from forcibly fired  
186 ascospores (white cloudy) were taken after 48 h incubation in boxes under high humidity and  
187 fluorescent light. We found that the forcible discharge of ascospores was severely compromised  
188 in *Δdcl1*, *Δago2*, *Δrdrp1*, *Δrdrp2*, *Δqde3*, and less severe in *Δdcl2*, *Δago1*, *Δqip1*, while *Δrdrp3*  
189 and *Δrdrp4* were indistinguishable from IFA WT. (**Figures 3 A, B**). Microscopic observation  
190 of the discharged ascospores revealed that their morphology was not affected (not shown).  
191 However, the percentage of discharged ascospores that retained the ability to germinate varied  
192 in the mutants with *Δrdrp3* and *Δrdrp4*, showing strong reduction in the ascospore germination  
193 (**Figure 3 C**; see **Table 2**). Together, these results confirm that the RNAi pathway is involved  
194 in sexual reproduction, though the requirement of individual RNAi components greatly varies  
195 in the different developmental stages.

196

197

### 198 ***F. graminearum* RNAi mutants show variation in kernel infection**

199 It has been reported that *Fg* mutants defective in DCL, AGO, or RdRP were not compromised  
200 in virulence on wheat spikes (Chen et al., 2015). We extended this previous study by testing  
201 additional *Fg* RNAi mutants. Conidia were point-inoculated to a single spikelet at the bottom  
202 of a spike of the susceptible wheat cultivar Apogee. Fungal colonization was quantified nine  
203 and 13 days post inoculation (dpi) by determining the infection strength. Infected parts of a  
204 spike bleached out, whereas the non-inoculated spikes remained greenish. At late infection  
205 stages (13 dpi), all RNAi mutants caused strong FHB symptoms comparable with IFA WT.  
206 However, we found clear differences in the severity of infections at earlier time points (9 dpi),  
207 with *Δdcl1* and *Δago2* showing most compromised FHB development (**Figure 4 A**; see **Table**

208 2). At 13 dpi, RNAi mutants also showed considerable variation on *Fg*-infected kernel  
209 morphology (**Figure S4 A**). Thousand-grain-weight (TGW) of kernels infected with RNAi  
210 mutants showed slight, though not significant differences, in the total weights compared to IFA  
211 WT infection (**Figure S4 B**).

## 212 213 **DON production is compromised in *F. graminearum* mutants that show reduced** 214 **pathogenicity on wheat kernels**

215 We quantified the amount of DON in *Fg*-infected wheat spikes at 13 dpi (point-inoculation  
216 using 5  $\mu$ l of 0.002% Tween 20 water containing 40,000 conidia / mL) at mid-anthesis. Of note,  
217 the relative amount of DON [rDON], calculated as [DON] relative to the amount of fungal  
218 genomic DNA, was reduced in virtually all spikes infected with RNAi mutants, whereby spikes  
219 infected by  *$\Delta qip$*  and  *$\Delta dcl2$*  showed the lowest toxin reduction as compared with the other  
220 mutants (**Table 3**). The data suggest that fungal RNAi pathways affect *Fg*'s DON production  
221 in wheat spikes. While [rDON] changed, the ratio of [DON] and [A-DON] (comprising 3A-  
222 DON and 15A-DON) remained constant in all mutants vs. IFA WT, suggesting that the fungal  
223 RNAi pathways do not affect the trichothecene metabolism.

## 224 225 ***F. graminearum* RecQ helicase mutant *$\Delta qde3$* is insensitive to dsRNA**

226 Spraying plant leaves or fruits with dsRNA targeting essential fungal genes can reduced  
227 fungal infections by spray-induced gene silencing (SIGS) (Koch et al., 2016; Wang et al.,  
228 2016b; Dalakouras et al., 2016; McLoughlin et al., 2018). We addressed the question which  
229 RNAi mutants are compromised in SIGS upon treatment with dsRNA. To this end, we  
230 conducted a SIGS experiment on detached barley leaves that were sprayed with 20 ng  $\mu$ L<sup>-1</sup>  
231 CYP3RNA, a 791 nt long dsRNA that targets the three fungal genes *FgCYP51A*, *FgCYP51B*  
232 and *FgCYP51C* (Koch et al., 2016). By 48 h after spraying, leaves were drop inoculated with  
233  $5 \times 10^4$  conidia ml<sup>-1</sup> of *Fg* RNAi mutants and IFA WT. Five days later, infected leaves were  
234 scored for disease symptoms and harvested to measure the expression of the fungal target genes  
235 by qPCR (**Figure 5**). As revealed by reduced disease symptoms, leaves sprayed with  
236 CYP3RNA vs. TE (buffer control), only  *$\Delta qde3$*  was equally sensitive to dsRNA like the IFA  
237 WT, while all other mutants tested in this experiment were slightly or strongly compromised in  
238 SIGS and less sensitive to CYP3RNA (**Figure 5 A**, see **Table 2**). Consistent with this, strong  
239 down-regulation of all three *CYP51* target genes was observed only in IFA WT and  *$\Delta qde3$* . In  
240  *$\Delta dcl1$* ,  *$\Delta dcl2$*  and  *$\Delta qip1$* , the inhibitory effect of CYP3RNA on *FgCYP51A*, *FgCYP51B* and  
241 *FgCYP51C* expression was completely abolished (**Figure 5B**). To further substantiate this  
242 finding, we tested a *dcl1/dcl2* double mutant in *Fg* strain PH1. As anticipated from the



243 experiments with IFA WT, the PH1 *dcl1/dcl2* mutant was fully compromised in SIGS (**Figures**  
244 **5A, B**).  
245

246

## 247 **Discussion**

248 We generated a broad collection of knock-out mutants for RNAi genes in the necrotrophic,  
249 mycotoxin-producing pathogen *Fusarium graminearum* to demonstrate their involvement in  
250 vegetative and generative growth, disease development, mycotoxin production, and sensitivity  
251 to environmental RNAi. A summary of the mutants' performance in the various processes is  
252 shown in Table 2. While all RNAi mutants show normal vegetative development in axenic  
253 cultures, there were differences in pigments production in liquid potato extract glucose cultures.  
254 This suggests that in *Fg* an RNAi pathway regulates the gene cluster responsible for the  
255 biosynthesis of pigments, including aurofusarin. Aurofusarin is a secondary metabolite  
256 belonging to the naphthoquinone group of polyketides that shows antibiotic properties against  
257 filamentous fungi and yeast (Medentsev et al., 1993). The function of the compound in the  
258 fungus is unknown as white mutants have a higher growth rate than the wt and are as pathogenic  
259 on wheat and barley (Malz et al., 2005).

260 Overall, the contribution of the RNAi pathways to vegetative fungal development and  
261 conidiation varies among different fungi and must be considered case by case. Under low light  
262 ( $< 2 \mu\text{mol m}^{-2} \text{s}^{-1}$ ) all *Fg* RNAi mutants showed reduced conidia production and some showed  
263 aberrant germination compared to IFA WT. This suggests that in the absence of light induction  
264 the RNAi pathway is required for conidiation. RNAi may play a role in regulation of light  
265 responsive genes affecting conidiation as shown for *T. atroviride*, where DCL2 and RdRP3  
266 control conidia production under light induction (Carreras-Villaseñor et al., 2013). The authors  
267 claimed that *Δdcl2* and *Δrdp3* are impaired in perception and/or transduction of the light signal  
268 affecting the transcriptional response of light-responsive genes. Similarly, *Metarhizium*  
269 *robertsii dcl* and *ago* mutants show reduced abilities to produce conidia under light, though the  
270 light quantity was not described (Meng et al., 2017).

271 Perithecia development has been used to study sexual development and transcription of genes  
272 related to sexual development (Trail et al., 2000; Qi et al., 2006; Hallen et al., 2007). In field  
273 situations, ascospores serve as the primary inoculum for FHB epidemics because these spores  
274 are shot into the environment and can spread long distances (Maldonado-Ramirez et al., 2005).  
275 We found that all RNAi mutants could produce mature perithecia. However, corroborating and  
276 extending the exemplary work of Son et al. (2017), we also found that, beside *FgDCL1* and  
277 *FgAGO2*, other RNAi genes such as *RdRP1*, *RdRP2*, *RdRP3*, *RdRP4*, *QDE3*, *QIP* contribute  
278 to the sexual reproduction. Mutations in these genes either showed severe defect in forcible  
279 ascospore discharge or significantly reduced germination. The Son et al. (2017) study showed

280 that *Fgdcl1* and *Fgago2* are severely defective in forcible ascospore discharge, while *Fgdcl2*  
281 and *Fgago1* show indistinguishable phenotypes compared to the wt. Active roles for *FgDCL1*  
282 and *FgAGO2* is supported by the finding that expression levels of many genes, including those  
283 closely related to the mating-type (*MAT*)-mediated regulatory mechanism during the late stages  
284 of sexual development, was compromised in the respective mutants after sexual induction (Kim  
285 et al., 2015). Moreover, *FgDCL1* and *FgAGO2* participate in the biogenesis of sRNAs and  
286 perithecia-specific miRNA-like RNAs (milRNAs) also are dependent on *FgDCL1* (Zeng et al.,  
287 2018). Most of the produced sRNA originated from gene transcript regions and affected  
288 expression of the corresponding genes at a post-transcriptional level (Son et al., 2017).

289 While our data show that, in addition to *FgDCL1* and *FgAGO2*, more *Fg* RNAi-related proteins  
290 are required for sex-specific RNAi, further transcriptomic analysis and sRNA characterization  
291 are needed for a mechanistic explanation. Of note, ex-siRNA functions are important for  
292 various developmental stages and stress responses in the fungus *M. circinelloides*, while *Fg*  
293 utilizes ex-siRNAs for a specific developmental stage. Thus, ex-siRNA-mediated RNAi might  
294 occur in various fungal developmental stages and stress responses depending on the fungal  
295 species.

296 We investigated the involvement of RNAi in pathogenicity and FHB development by infecting  
297 wheat spikes of the susceptible cultivar Apogee with fungal conidia. At earlier time points of  
298 infection (9 dpi) clear differences in virulence between RNAi mutants were observed, though  
299 all mutants could spread within a spike and caused typical FHB symptoms at later time points  
300 (13 dpi). Despite full FHB symptom development in all mutants at 13 dpi, we observed various  
301 effects of fungal infection on the kernel morphology, corresponding to the different  
302 aggressiveness of mutants at early time points. Since this phenomenon may account for  
303 differences in producing mycotoxins during infection, we quantified mycotoxins in the kernels.  
304 Of note, [rDON] was reduced in virtually all spikes infected with RNAi mutants, whereby  
305 [rDON] was strongly reduced especially in spikes colonized with mutants *Δago1*, *Δrdrp1*,  
306 *Δrdrp2*, *Δrdrp3*, *Δrdrp4* and *Δqde3* as compared with IFA WT (see Table 2 and Table 3). The  
307 data suggest that fungal RNAi pathways affect *Fg*'s DON production in wheat spikes. While  
308 [rDON] changed, the ratio of [DON] and [3A-DON] remained constant in all mutants vs. IFA  
309 WT, suggesting that the fungal RNAi pathways do not affect the trichothecene chemotype.

310 Our work also identifies additional *Fg* RNAi proteins associated with sensitivity to dsRNA  
311 treatments. For the validation of the effects we used two independent tests: infecting  
312 phenotyping and qRT-PCR analysis of fungal target genes. *Δdcl1* and *Δdcl2* as well as *Δqip* and  
313 *Δrdrp* showed compromised SIGS phenotypes in either tests, strongly suggesting that these

314 proteins are required for environmental RNAi in *Fg*. Further substantiating our finding, the  
315 fungal *dcl1/dcl2* double mutant of *Fg* strain PH1 also showed complete insensitivity to dsRNA  
316 and thus is fully compromised to environmental RNAi.  
317 Taken together, our results further substantiate the involvement of RNAi pathways in  
318 conidiation, ascosporeogenesis and pathogenicity of *Fg*. Nevertheless, further studies must  
319 explore the mechanistic roles of *Fg* RNAi genes in these processes.  
320

321 **Methods:**

322

323 **Fungal material, generation of gene deletion mutants in *Fusarium graminearum***

324 The *Fg* strain PH1 and the PH1 *dcl1 dcl2* double mutant were a gift of Dr. Martin Urban,  
325 Rothamsted Research, England. RNAi gene deletion mutants were generated in the *Fg* strain  
326 IFA65 (Jansen et al. 2005) hereafter termed IFA WT. They were generated by homolog  
327 recombination using the pPK2 binary vector. *Fg* RNAi genes were identified by blasting  
328 *Neurospora crassa* genes against the Fusarium genome sequence in the Broad institute data  
329 base. Disruption vectors were constructed by inserting two flanking fragments (~1000 bp)  
330 upstream and downstream the corresponding genes in the pPK2 vector as follows: *RdRP1*,  
331 *AGO1*, *QDE3*, *QIP*, *AGO2*, *DCL1*, *RdRP2*, *RdRP3*, *RdRP4* and *DCL2* upstream flanking  
332 sequences were inserted in the plasmid between PacI- KpnI restriction sites, and the  
333 downstream flanking sequence were inserted between XbaI- HindIII restriction sites. Except  
334 *AGO2* downstream flanking sequence was inserted in XbaI restriction site (primers used in  
335 disruption plasmid construction are listed in Table S1. Disruption vectors were introduced into  
336 *Agrobacterium tumefaciens* (LBA440 and AGL1 strains) by electroporation. A single colony  
337 of *Agrobacterium* containing the pPK2 plasmid were grown in 10 ml YEB medium (Vervliet  
338 et al., 1975) containing the appropriate antibiotics (5 µg/ml tetracycline + 25 µg/ml rifampicin +  
339 50 µg/ml Kanamycin for LBA440, and 25 µg/ml carbenicillin + 25 µg/ml rifampicin + 50 µg/ml  
340 kanamycin for AGL1) and were incubated at 28°C till OD<sub>600nm</sub> 0.7 was reached. T-DNA was  
341 mobilized in *Agrobacterium* with 200 µM acetosyringone, and *Agrobacterium* and fungal  
342 recipient IFA WT were co-cultivated on black filter paper (DP 551070, Albert LabScience,  
343 Hahnemühle, Dassel, Germany), respectively. Putative fungal mutants were selected on potato  
344 extract glucose (PEG) medium containing 150 µg/ml hygromycin + 150 µg/ml ticarcillin and  
345 grown for five days. For genotyping, genomic DNA of putative Fusarium mutants were  
346 extracted from mycelia.

347

348 **Genotyping of Fusarium mutants**

349 *Fg* IFA mutants were confirmed by genotyping using primers located in hygromycin and  
350 corresponding gene flanking sequences (located after the cloned flanking sequence in the  
351 genome) (Table S2). Upon amplification the samples were sequenced. Additionally, mRNA  
352 expression levels of deleted vs. levels in IFA WT was measured by quantitative real time PCR  
353 (qRT-PCR) using primers pairs listed in (Table S3). The mRNA transcripts were measured  
354 using 1 x SYBR Green JumpStart Taq Ready Mix (Sigma-Aldrich, Germany) according to

355 manufacturer's instructions and assayed in 7500 Fast Real-Time PCR cycler (Applied  
356 Biosystems Inc, CA, USA) under the following thermal cycling conditions: initial activation  
357 step at 95°C for 5 min, 40 cycles (95°C for 30 s, 53°C for 30 s, and 72°C for 30 s). The Ct  
358 values were determined with the software in the qRT-PCR instrument and the transcript levels  
359 of the genes was determined according to the  $2^{-\Delta\Delta Ct}$  method (Livak and Schmittgen, 2001).

360

### 361 **Colony morphology**

362 The RNAi mutants were cultured on PEG (ROTH, Germany); starch agar (SA) and synthetic  
363 nutrient agar (SNA) (Leslie and Summerell, 2006). The cultures were incubated at 25°C in 12  
364 h light/12 h dark ( $52 \mu\text{mol m}^{-2} \text{s}^{-1}$ , Philips Master TL-D HF 16W/840). The growth was  
365 documented after 5 days. For growth in liquid cultures, agar blocks from two-week-old fungal  
366 cultures were incubated on liquid PEG medium for five days at room temperature (RT), light  
367 ( $2 \mu\text{mol m}^{-2} \text{s}^{-1}$ ) with shaking. Each mutant was grown in flask containing medium  
368 supplemented with hygromycin (100  $\mu\text{g/ml}$ ) and flask containing medium without hygromycin.  
369 Photos were taken to document the growth pattern after five days incubation.

370

### 371 **Production of fungal biomass**

372 Fifty milligram mycelia (fresh mycelia from four-day-old fungal cultures grown on *Aspergillus*  
373 complete medium (CM) plates in the dark; Leslie and Summerell, 2006) were incubated in a  
374 100 ml flask containing 20 ml of PEG medium incubated at RT with shaking under 12 h light  
375 ( $2 \mu\text{mol m}^{-2} \text{s}^{-1}$ ). Fungal mycelium was harvested after three days by filtration through filter  
376 paper (Munktell, AHLSTROM, Germany GMBH), washed with distilled water twice and dried  
377 at 75°C overnight. The dry weight was calculated by using the following formula: Dry weight  
378 = (weight of filter paper + mycelium) - (weight of filter paper).

379

### 380 **Conidiation assay**

381 Production of conidia was done according to Yun et al., (2015) with slight modification. Four-  
382 day-old cultures of each mutant and IFA WT growing in CM agar plates in the dark at 25°C  
383 were used for fresh mycelia preparation. The mycelia were scraped from the plate surface using  
384 a sterile toothpick, then 50 mg mycelia were inoculated in a 100 ml flask containing 20 ml of  
385 SN medium. The flasks were incubated at RT for five days in light ( $2 \mu\text{mol m}^{-2} \text{s}^{-1}$ ) on a shaker  
386 (100 rpm). Subsequently, the conidia produced from each mutant and wt were counted using a  
387 hemocytometer (Fuchs Rosenthal, Superior Marienfeld, Germany).

388



389 **Viability test of conidia**

390 Fourteen mL from the same cultures used in conidiation assay were centrifuged at 4,000 rpm  
391 for 10 min to precipitate conidia. The conidia were resuspended in 5 ml 2% sucrose water and  
392 incubated in dark for two days at 23°C. Germinated and non-germinated conidia were  
393 visualized and counted under an inverse microscope. Conidia germination rate was determined  
394 as percentage of germinated conidia of the total conidia number.

395

396 **Perithecia production and ascospore discharge assay**

397 Fungi were grown on carrot agar prepared under bright fluorescent light at RT (18-24°C) for  
398 five days (Klittich and Leslie, 1988). Aerial mycelia were removed with a sterile tooth stick.  
399 To stimulate sexual reproduction and perithecia formation, one ml of 2.5% Tween 60 was  
400 applied to the plates with a sterile glass rod after scraping the mycelia (Cavinder et al., 2012).  
401 The plates were incubated under fluorescent light at RT for nine days. Subsequently, agar  
402 blocks (1.5 cm in diameter) were cut from the plates containing the mature perithecia using a  
403 cork borer. Agar blocks were sliced in half, placed on glass microscope slides, and incubated  
404 in boxes under high humidity for two days under 24 h light ( $52 \mu\text{mol m}^{-2} \text{s}^{-1}$  Philips Master TL-  
405 D HF 16W/840). During this time, ascospores discharged from the perithecia accumulated on  
406 the slide. For the quantification of discharged ascospores, slides were washed off by 2 ml of an  
407 aqueous Tween 20 (0.002%) solution and counted using a hemocytometer.

408

409 **Viability test of the discharged ascospores**

410 Mycelia with mature perithecia (13 days after sexual induction) on carrot agar were incubated  
411 in a humid box at RT under light for four days according to Son et al., (2017). The discharged  
412 ascospores were washed from the plate cover using SN liquid medium and incubated in the  
413 dark for 24 h in a humid box. The germinated and non-germinated ascospores were visualized  
414 under an inverse microscope and counted.

415

416 **Pathogenicity assay on wheat ears**

417 The susceptible wheat cultivar Apogee was used. Plants were grown in an environmentally  
418 controlled growth chamber (24°C, 16 h light,  $180 \mu\text{mol m}^{-2} \text{s}^{-1}$  photon flux density, 60% rel.  
419 humidity) till anthesis. Point inoculations to the second single floret of each spike were  
420 performed at mid-anthesis with 5  $\mu\text{L}$  of a 40,000 conidia/mL suspension amended with 0.002%  
421 v/v Tween 20 (Gosman et al., 2010). Control plants were treated with sterile Tween 20. For  
422 each *Fg* genotype, ten wheat heads were inoculated and incubated in plastic boxes misted with

423 water to maintain high humidity for two days. Incubation continued at 22°C in 60% rel.  
424 humidity. Infected wheat heads were observed nine and 13 dpi and infection percentage was  
425 determined as the ratio of infected spikelets to the total spikelet number per ear.

426

#### 427 **Thousand Grain Weight (TGW) of infected wheat kernels**

428 A hundred kernels from two biological experiments with 10 wheat heads point-inoculated with  
429 IFA WT and mutants were counted and weighed. TGW was calculated in grams per 1000  
430 kernels of cleaned wheat seeds.

431

#### 432 **Quantification of fungal DNA in infected wheat kernels**

433 Fungal genomic DNA in kernels was quantified using qPCR as described (Brandfass and  
434 Karlovsky, 2008). Dried grains were ground and DNA was extracted from 30 mg flour and  
435 dissolved in 50 µl of TE buffer. One µl of 50x diluted DNA was used as template for RT-PCR  
436 with primers amplifying a 280 bp fragment specific for *Fg*. The PCR mix consisted of reaction  
437 buffer (16 mM (NH<sub>4</sub>)<sub>2</sub>SO<sub>4</sub>, 67 mM Tris–HCl, 0.01% Tween-20, pH 8.8 at 25°C; 3 mM MgCl<sub>2</sub>,  
438 0.3 µM of each primer, 0.2 mM of each dATP, dTTP, dCTP and dGTP (Bioline), 0.03 U/µl  
439 Taq DNA polymerase (Bioline, Luckenwalde, Germany) and 0.1x SYBR Green I solution  
440 (Invitrogen, Karlsruhe, Germany). The PCR was performed in CFX384 thermocycler (BioRad,  
441 Hercules, CA, USA) according to the following cycling condition: Initial denaturation 2 min at  
442 95°C, 35 cycles with 30 s at 94°C, 30 s at 61°C, 30 s at 68°C, and final elongation for 5 min at  
443 68°C. No matrix effects were detectable with 50-fold diluted DNA extracted from grains.  
444 Standards were prepared from pure *Fg* DNA in 3-fold dilution steps from 100 pg to 0.4 pg/well.

445

#### 446 **Analysis of mycotoxins in infected wheat kernels**

447 The content of mycotoxins in wheat kernels infected with *Fg* RNAi mutants and IFA WT was  
448 determined using high performance liquid chromatography coupled to tandem mass  
449 spectrometry (HPLC–MS/MS). Mycotoxins were extracted from ground grains with mixture  
450 containing 84% acetonitrile, 15% water and 1% acetic acid and the extracts were defatted with  
451 cyclohexane. Chromatographic separation was carried out on a C18 column eluted with a  
452 water/methanol gradient and the analytes were ionized by electrospray and detected by MS/MS  
453 in multiple reaction monitoring (MRM) mode essentially as described (Sulyok et al., 2006).

454

#### 455 **Spray application of dsRNA on barley leaves**

456 Second leaves of three-week-old barley cultivar Golden Promise were detached and transferred  
457 to square Petri plates containing 1% water-agar. dsRNA spray applications and leaf inoculation  
458 was done as described (Koch et al. 2016). For the TE-control, TE-buffer was diluted in 500  $\mu$ l  
459 water corresponding to the amount used for dilution of the dsRNA. Typical RNA concentration  
460 after elution was 500 ng  $\mu$ l<sup>-1</sup>, representing a buffer concentration of 400  $\mu$ M Tris-HCL and 40  
461  $\mu$ M EDTA in the final dilution. TE buffer were indistinguishable from treatments with control  
462 dsRNA generated from the GFP or GUS gene, respectively (Koch et al., 2016; Koch et al.,  
463 2018). Thus, we used TE buffer as control to save costs. Spraying of the leaves was carried out  
464 in the semi-systemic design (Koch et al. 2016), where the lower parts of the detached leaf  
465 segments were covered by a tinfoil to avoid direct contact of dsRNA with the leaf surface that  
466 was subsequently inoculated.

467

#### 468 **Statistics and analysis**

469 Data obtained from two or three repetitions were subjected to the Student's *t* test in Microsoft  
470 office Excel 2010. Significance was determined as  $P \leq 0.05$ , 0.01 or 0.001 and indicated by \*,  
471 \*\* or \*\*\*, respectively. Unless specified otherwise, data are presented as mean  $\pm$  standard error  
472 or mean  $\pm$  standard deviation of the mean. Sequence analysis was performed on the ApE  
473 plasmid editor free tool. Basic Local Alignment Search Tool (BLAST) NCBI BLAST  
474 (<http://blast.ncbi.nlm.nih.gov/Blast.cgi>) was used for sequences search and alignment.

475

#### 476 **List of abbreviations**

477

478 AGO, ARGONAUTE  
479 CYP51, *Cytochrome P450 lanosterol C-14 $\alpha$ -demethylase*  
480 DCL, DICER-like  
481 DON, deoxynivalenol  
482 *Fg*, *Fusarium graminearum*  
483 FHB, Fusarium head blight  
484 HIGS, host-induced gene silencing  
485 hpRNA, hairpin RNA  
486 MSUD, meiotic silencing by unpaired DNA  
487 NIV, nivalenol  
488 PEG, potato extract glucose  
489 QDE 2,3, Quelling defective 2,3

490 QIP, QDE-interacting protein  
491 RdRp, RNA-dependent RNA polymerase  
492 RISC, RNA-dependent silencing complex  
493 RNAi, RNA interference  
494 RPA, subunit of replication protein A  
495 siRNA, small interfering RNA  
496 SN, synthetic nutrient agar  
497 ssDNA, single-stranded  
498 TGW, thousand grain weight

499

#### 500 **Declarations**

#### 501 **Ethics approval and consent to participate**

502 Not applicable

#### 503 **Consent for publication**

504 Not applicable

#### 505 **Availability of data and material**

506 All data generated or analysed during this study are included in this published article [and its  
507 supplementary information files].

#### 508 **Competing interests**

509 The authors declare that they have no competing interests" in this section.

510

#### 511 **Funding**

512 This research was supported by the German Research Council (DFG) to K.-H. K and AK in the  
513 project GRK2355.

514

#### 515 **Acknowledgements**

516 We thank Mrs. E. Stein for excellent technical assistance, Dr. A. Rathgeb for mycotoxin  
517 analysis and Ms. C. Birkenstock for caring of the plants. We also thank Dr. Martin Urban,  
518 Rothamsted Research, England for providing the *Fg* strains PH1 and PH1 *dcl1 dcl2*.

519 **Legends to figures**

520

521 **Fig. 1. PCR verification of targeted gene replacement in *Fusarium graminearum*. (A)**

522 Amplification of an internal part of the targeted genes *DCL1*, *DCL2*, *AGO1*, *AGO2*, *RdRP1*,  
523 *RdRP4*, *RdRP2*, *RdRP3*, *QIP*, and *QDE3* are positive in IFA WT and negative in corresponding  
524 mutants. **(B)** PCR with primer pairs in the right recombination sequence and hygromycin,  
525 showing that the antibiotic resistance gene had integrated into the target gene locus. PCR  
526 products were analyzed on 1.5% agarose gel electrophoresis. M; DNA marker. wt; wild type.

527

528 **Fig. 2. The RNAi pathway is required for asexual development of *Fusarium graminearum***

529 **in the absence of inductive light. (A)** Number of conidia produced: Means $\pm$  SEs of the  
530 percentage of conidia numbers from three repeated experiments. Significant differences are  
531 marked: \*P, 0.05, \*\*P, 0.01, \*\*\*P, 0.001 (Student's *t* test). **(B)** Percent of conidial germination:  
532 Means $\pm$  SEs of the percentage of germinated spores from three biological repetitions.  
533 Significant differences are marked: \*P, 0.05 (Student's *t* test). **(C)** Microscopic observation of  
534 germinated and non-germinated conidia of IFA WT and  $\Delta$ *rdrp4*. Imaging after 48 h incubation  
535 in the dark, scale bar: 50  $\mu$ m. Black arrow; conidia forming a bipolar germ tube. Red arrow;  
536 conidia forming multiple germ tubes.

537

538 **Fig. 3. Forcible ascospore discharge in *Fusarium graminearum* RNAi mutants and IFA**

539 **WT. (A)** Forcible ascospore firing. Half circular carrot agar blocks covered with mature  
540 perithecia were placed on glass slides. Photos from forcibly fired ascospores (white cloudy)  
541 were taken after 48 h incubation in boxes under high humidity and fluorescent light. **(B)** Fired  
542 ascospores were washed off and counted. Means $\pm$  SDs of the counted spores is presented from  
543 three biological repetitions. Significant differences are marked: \*P, 0.05, \*\*\*P, 0.001  
544 (Student's *t* test). **(C)** Ascospore germination. Discharged ascospores were incubated at 100%  
545 RT in the dark for 24 h at 23°C in SN liquid medium. The percentage of germination was  
546 assessed by examining the ascospore number in three random squares in the counting chamber.  
547 Means $\pm$  SEs of the percentage of germinated spores from three biological repetitions.  
548 Significant differences are marked: \*P, 0.05 (Student's *t* test).

549

550 **Fig. 4. Infection of Apogee wheat spikes with *Fusarium graminearum* RNAi mutants and**

551 **IFA WT. (A)** Representative samples of spikes at 9 and 13 dpi. One spikelet at the bottom of  
552 each spike (red arrow) was point inoculated with 5  $\mu$ l of 0.002% Tween 20 water containing

553 40,000 conidia / mL. The assay was repeated two times with 10 spikes per fungal genotype and  
554 experiment. **(B)** Wheat kernels 13 dpi with *Fg* RNAi mutants and IFA WT.

555

556 **Fig. 5 Infection symptoms of *Fg* RNAi mutants on barley leaves sprayed with the dsRNA**  
557 **CYP3RNA. A.** Detached leaves of three-week-old barley plants were sprayed with 20 ng  $\mu\text{l}^{-1}$   
558 CYP3RNA or TE buffer, respectively. After 48 h, leaves were drop-inoculated with  $5 \times 10^4$   
559 conidia  $\text{ml}^{-1}$  of indicated *Fg* RNAi mutants and evaluated for infection symptoms at 5 dpi.  
560 Values show relative infection area as calculated from TE- vs. CYP3RNA-treated plants for  
561 each RNAi mutant with 10 leaves and three biological repetitions. Asterisks indicate statistical  
562 significant reduction of the infection area on CYP3RNA- vs. TE-treated plants measured by  
563 ImageJ for each mutant (\*\* $p < 0,01$ ; \*\*\* $p < 0,001$ ; students t-test). The *dcl1 dcl2* double mutant  
564 is generated in *Fg* strain PH1. **(B).** Downregulation of the three *CYP51* genes in *Fg* mutants  
565 upon colonization of CYP3RNA- vs. TE-treated barley leaves. Asterisks indicate statistical  
566 significant downregulation of *CYP51* genes on CYP3RNA vs. TE-treated plants. (\*\* $p < 0,01$ ;  
567 \*\*\* $p < 0,001$ ; students t-test). Error bars indicate SE of three independent experiments in A and  
568 B.

569

## 570 References

- 571 Audenaert, K., Vanheule, A., Höfte, M., and Haesaert, G. (2014). Deoxynivalenol: A major player in  
572 the multifaceted response of *Fusarium* to its environment. *Toxins*. 6, 1–19.
- 573 Bai, Y., Lan, F., Yang, W., Zhang, F., Yang, K., Li, Z. et al. (2015). sRNA profiling in *Aspergillus*  
574 *flavus* reveals differentially expressed miRNA-like RNAs response to water activity and temperature.  
575 *Fungal Genet. Biol.* 81, 113–119.
- 576 Baulcombe, D.C. (2013). Small RNA—the Secret of Noble Rot. *Science*. 342(6154), 45–46.
- 577 Brandfass, C., and Karlovsky, P. (2008). Upscaled CTAB-based DNA extraction and real-time PCR  
578 assays for *Fusarium culmorum* and *F. graminearum* DNA in plant material with reduced sampling error.  
579 *Int. J. Mol. Sci.* 9(11), 2306–2321.
- 580 Brown, N., Evans, A.J., Mead, A., and Hammond-Kosack, K.E. (2017). A spatial temporal analysis of  
581 the *Fusarium graminearum* transcriptome during symptomless and symptomatic wheat infection. *Mol.*  
582 *Plant Pathol.* 18(9), 1295–1312.
- 583 Cai, Q., He, B., Kogel, K.H., and Jin, H. (2018). Cross-kingdom RNA trafficking and environmental  
584 RNAi — nature’s blueprint for modern crop protection strategies. *Curr. Opin. Microbiol.* 46, 58–64.
- 585 Calo, S., Nicolás, F.E., Vila, A., Torres-Martínez, S., and Ruiz-Vázquez, R.M. (2012). Two distinct  
586 RNA-dependent RNA polymerases are required for initiation and amplification of RNA silencing in the  
587 basal fungus *Mucor circinelloides*. *Mol. Microbiol.* 83(2), 379-94.
- 588 Campo, S., Gilbert, K.B., and Carrington, J.C. (2016). Small RNA-based antiviral defense in the  
589 phytopathogenic fungus *Colletotrichum higginsianum*. *PLoS Pathog.* doi:  
590 10.1371/journal.ppat.1005640.



- 591 Carreras-Villaseñor, N., Esquivel-Naranjo, E.U., Villalobos-Escobedo, J.M., Abreu-Goodger, C., and  
592 Herrera-Estrella, A. (2013). The RNAi machinery regulates growth and development in the filamentous  
593 fungus *Trichoderma atroviride*. *Mol. Microbiol.* 89(1), 96–112.
- 594 Cavinder, B., Sikhakolli, U., Fellows, K.M., Trail, F. (2012). Sexual development and ascospore  
595 discharge in *Fusarium graminearum*. *J. Vis. Exp.* doi: 10.3791/3895.
- 596 Chang, SS, Zhang, Z, and Liu, Y. (2012). RNA interference pathways in fungi: mechanisms and  
597 functions. *Annu. Rev. Microbiol.* 66, 305–23.
- 598 Chen, Y, Gao, Q., Huang, M., Liu, Y., Liu, Z, Liu X., and Ma, Z. (2015). Characterization of RNA  
599 silencing components in the plant pathogenic fungus *Fusarium graminearum*. *Sci Rep.* 5, 12500.
- 600 Cogoni, C, and Macino, G. (1999). Gene silencing in *Neurospora crassa* requires a protein homologous  
601 to RNA-dependent RNA polymerase. *Nature.* 399(6732), 166–169.
- 602 Cuomo, C.A., Guldener, U., Xu, J.R., Trail, F., Turgeon, B.G., Di Pietro A., et al. (2007). The *Fusarium*  
603 *graminearum* genome reveals a link between localized polymorphism and pathogen specialization.  
604 *Science.* 317(5843), 1400–1402.
- 605 Dalakouras, A, Wassenegger, M, McMillan, J.N., Cardoza, V., Maegele, I, Dadami, E., Runne, M,  
606 Krczal, G., and Wassenegger, M.K. (2016). Induction of silencing in plants by high-pressure spraying  
607 of *in vitro*-synthesized small RNAs. *Front. Plant Sci.* doi.org/10.3389/fpls.2016.01327.
- 608 Dang, Y, Yang, Q, Xue, Z, and Liu, Y. (2011). RNA Interference in Fungi: Pathways, Functions, and  
609 Applications. *Eukaryot. Cell.* 10(9), 1148–1155.
- 610 Dean, R., Van Kan, J.A., Pretorius, Z.A., Hammond-Kosack, K.E., Di Pietro, A., Spanu, P.D., Rudd,  
611 J.J., Dickman, M., Kahmann, R., Ellis J., and Foster, G.D. (2012). The top 10 fungal pathogens in  
612 molecular plant pathology. *Mol. Plant Pathol.* 13, 414–430.
- 613 Desjardins, A.E., Hohn, T.M., and McCormick, S.P. (1993). Trichothecene biosynthesis in *Fusarium*  
614 species: Chemistry, genetics and significance. *Microbiol. Rev.* 57(3), 595–604.
- 615 Dill-Macky, R, and Jones, RK. (2000). The effect of previous crop residues and tillage on *Fusarium*  
616 head blight of wheat. *Plant Dis.* 84, 71–76.
- 617 Fire, A, Xu, S, Montgomery, MK, Kostas, SA, Driver, SE, and Mello, CC. (1998). Potent and specific  
618 genetic interference by double-stranded RNA in *Caenorhabditis elegans*. *Nature.* 391(6669), 806–811.
- 619 Frandsen, R.J., Nielsen, N.J., Maolanon, N., Sørensen, J.C., Olsson, S., Nielsen, J., and Giese, H. (2006).  
620 The biosynthetic pathway for aurofusarin in *Fusarium graminearum* reveals a close link between the  
621 naphthoquinones and naphthopyrones. *Mol Microbiol.* 61(4), 1069–1080.
- 622 Gosman, N., Steed, A., Chandler, E., Thomsett, M., and Nicholson, P. (2010). Evaluation of type I  
623 *Fusarium* head blight resistance of wheat using non-deoxynivalenol-producing fungi. *Plant Pathol.*  
624 59(1), 147–157.
- 625 Hallen, H, Huebner, M, Shiu, SH, Guldener, U, and Trail, F. (2007). Gene expression shifts during  
626 perithecial development in *Gibberella zeae* (anamorph *Fusarium graminearum*), with particular  
627 emphasis on ion transport proteins. *Fungal Genet. Biol.* 44(11), 1146–1156.
- 628 Hammond, S.M. (2005). Dicing and slicing: the core machinery of the RNA interference pathway. *FEBS*  
629 *Lett.* 579(26), 5822–5829.
- 630 Harris, L.J, Balcerzak, M., Johnston, A., Schneiderman, D., and Ouellet, T. (2016). Host-preferential  
631 *Fusarium graminearum* gene expression during infection of wheat, barley, and maize. *Fungal Biol.* 120  
632 (1), 111–123.
- 633 Ilgen, P., Hadelar, B., Maier, F.J., and Schäfer, W. (2009). Developing kernel and rachis node induce  
634 the trichothecene pathway of *Fusarium graminearum* during wheat head infection. *Mol. Plant Microbe*  
635 *Interact.* 22(8), 899–908.

- 636 Jansen, C., von Wettstein, D., Schäfer, W., Kogel, K.H., Felk, F., and Maier, F.J. (2005). Infection  
637 patterns in barley and wheat spikes inoculated with wild type and trichodiene synthase gene disrupted  
638 *Fusarium graminearum*. *Proc. Natl. Acad. Sci USA*. 102 (46), 16892–16897.
- 639 Kim, H.K., Jo, S.M., Kim, G.Y., Kim D.W., Kim, Y.K., and Yun, S.H. (2015). A large-scale functional  
640 analysis of putative target genes of mating-type loci provides insight into the regulation of sexual  
641 development of the cereal pathogen *Fusarium graminearum*. *PLoS Genet.* 3;11(9):e1005486.
- 642 Klittich, C.J.R., and Leslie, J.F. (1988). Nitrate reduction mutants of *Fusarium moniliforme* (*Gibberella*  
643 *fujikuroi*). *Genetics*. 118(3), 417–423.
- 644 Koch, A., Biedenkopf, D., Furch, A., Weber, L., Roszbach O., Abdellatef E., Linicus, L., Johannsmeier,  
645 J., Jelonek, L., Goesmann, A., Cardoza V., McMillan, J., Mentzel, T., and Kogel, K.-H. (2016). An  
646 RNAi-Based Control of *Fusarium graminearum* infections through spraying of Long dsRNAs involves  
647 a plant passage and is controlled by the fungal silencing machinery. *PLoS Pathog.*  
648 doi:10.1371/journal.ppat.1005901.
- 649 Koch, A., and Kogel, K.H. (2014). New wind in the sails: improving the agronomic value of crop plants  
650 through RNAi-mediated gene silencing. *Plant Biotechnol. J.* 12(7), 821-31.
- 651 Koch, A., Kumar, N., Weber, L., Keller, H., Imani, J., and Kogel, K.H. (2013). Host-induced gene  
652 silencing of cytochrome P450 lanosterol C14 $\alpha$ -demethylase–encoding genes confers strong resistance  
653 to *Fusarium* species. *Proc. Natl. Acad. Sci. USA*. 110(48), 19324–19329.
- 654 Koch, A., Stein, E., and Kogel, K.-H. (2018). RNA-based disease control as a complementary measure  
655 to fight *Fusarium* fungi through silencing of the Azole target cytochrome P450 lanosterol C-14  $\alpha$ -  
656 demethylase. *Eu. J Plant Pathol.* 152(4), 1003–1010.
- 657 Kusch, S., Frantzeskakis, L., Thieron, H., and Panstruga, R. (2018). Small RNAs from cereal powdery  
658 mildew pathogens may target host plant genes. *Fungal Biol.* 122(11), 1050–1063.
- 659 Lau, S.K., Tse, H., Chan, J.S., Zhou, A.C., Curreem, S.O., Lau, C.C., Yuen, K.Y., and Woo, P.C. (2013).  
660 Proteome profiling of the dimorphic fungus *Penicillium marneffei* extracellular proteins and  
661 identification of glyceraldehyde-3-phosphate dehydrogenase as an important adhesion factor for  
662 conidial attachment. *FEBS J.* 280(24), 6613–26.
- 663 Leslie, J.F., Summerell, B.A. (2006) The *Fusarium* laboratory manual. Blackwell Professional, Ames,  
664 IA, USA; ISBN: 978-0-813-81919-8.
- 665 Livak, K.J., Schmittgen, T.D. (2001). Analysis of relative gene expression data using real-time  
666 quantitative PCR and the  $2^{-\Delta\Delta C(T)}$ . *Methods*. 25(4), 402–408.
- 667 Maldonado-Ramirez, S.L., Schmale, D.G., Jr Shields, E.J., and Bergstrom, G.C. (2005). The relative  
668 abundance of viable spores of *Gibberella zea* in the planetary boundary layer suggests the role of long-  
669 distance transport in regional epidemics of *Fusarium* head blight. *Agric. For. Meteorol.* 132, 20–27.
- 670 Malz, S., Grell, M.N., Thrane, C., Maier, F.J., Rosager, P., Felk, A., Albertsen, K.S., Salomon, S., Bohn  
671 L., Schäfer, W., and Giese, H. (2005). Identification of a gene cluster responsible for the biosynthesis  
672 of aurofusarin in the *Fusarium graminearum* species complex. *Fungal Genet. Biol.* 42(5), 420–33.
- 673 McLoughlin, A.G., Wytinck, N., Walker, P.L., Girard, I.J., Rashid, K.Y., de Kievit, T., Dilantha, W.G.  
674 Fernando, Whyard, S. and Belmonte, M.F. (2018) Identification and application of exogenous dsRNA  
675 confers plant protection against *Sclerotinia sclerotiorum* and *Botrytis cinerea*. *Sci. Rep.* 8, 7320.
- 676 Medentsev, A.G., Kotik, A.N., Trufanova, V.A., and Akimenko, V.K. (1993). Identification of  
677 aurofusarin in *Fusarium graminearum* isolates, causing a syndrome of worsening of egg quality in  
678 chickens. *Prikl Biokhim Mikrobiol.* 29(4), 542–546.
- 679 Mello, C.C., and Conte, D, Jr. (2004). Revealing the world of RNA interference. *Nature* 431(7006),  
680 338–342.

- 681 Meng, H, Wang, Z, Wang, Y, Zhu, H., and Huang, B. (2017). Dicer and Argonaute genes involved in  
682 RNA interference in the entomopathogenic fungus *Metarhizium robertsii*. *Appl. Environ. Microbiol.*  
683 83(7) pii: e03230-16. .
- 684 Nguyen, Q., Iritani, A., Ohkita, S., Vu, B.V., Yokoya, K., Matsubara, A., Ikeda, K.I., Suzuki, N.,  
685 Nakayashiki, H. (2018). A fungal Argonaute interferes with RNA interference. *Nucleic Acids Res.* 46(5),  
686 2495–2508.
- 687 Nowara, D., Gay, A., Lacomme, C., Shaw, J., Ridout, C., Douchkov, D., Hensel, G., Kumlehn, J., and  
688 Schweizer, P. (2010). HIGS: Host-induced gene silencing in the obligate biotrophic fungal pathogen  
689 *Blumeria graminis*. *Plant Cell.* 22, 3130–3141.
- 690 Qi, W., Kwon, C., and Trail, F. (2006). Microarray analysis of transcript accumulation during  
691 perithecial development in *Gibberella zeae* (anamorph *Fusarium graminearum*). *Mol. Genet.*  
692 *Genomics* 276(1), 87–100.
- 693 Raman, V., Simon, S.A., Demirci, F., Nakano, M., Meyers, B.C., and Donofrio, N.M. (2017) Small  
694 RNA functions are required for growth and development of *Magnaporthe oryzae*. *Mol. Plant Microbe*  
695 *Interact.* 30(7), 517–530.
- 696 Romano, N., and Macino, G. (1992). Quelling: transient inactivation of gene expression in *Neurospora*  
697 *crassa* by transformation with homologous sequences. *Mol. Microbiol.* 6(22), 3343-53.
- 698 Segers, G.C., Zhan,g X., Deng, F., Sun, Q., and Nuss, D.L. (2007). Evidence that RNA silencing  
699 functions as an antiviral defense mechanism in fungi. *Proc. Natl. Acad. Sci. USA.* 104(31), 12902–  
700 12906.
- 701 Shiu, P.K., Raju, N.B., Zickler, D., and Metzenberg, R.L. (2001). Meiotic silencing by unpaired DNA.  
702 *Cell.* 107(7), 905–916.
- 703 Son, H., Min, K., Lee, J., Raju, N.B., and Lee, Y.W. (2011). Meiotic silencing in the homothallic fungus  
704 *Gibberella zeae*. *Fungal Biol.* 115(12), 1290-302.
- 705 Son, H., Park, A.R., Lim, J.Y., Shin, C., and Lee, Y.W. (2017). Genome-wide exonic small interference  
706 RNA-mediated gene silencing regulates sexual reproduction in the homothallic fungus *Fusarium*  
707 *graminearum*. *PLoS Genet.* doi.org/10.1371/journal.pgen.1006595.
- 708 Song, M.S., and Rossi, J.J. (2017). Molecular mechanisms of Dicer: endonuclease and enzymatic  
709 activity. *Biochem J.* 474(10), 1603–1618.
- 710 Sulyok, M., Berthiller, F., Krska, R., and Schuhmacher, R. (2006). Development and validation of a  
711 liquid chromatography/tandem mass spectrometric method for the determination of 39 mycotoxins in  
712 wheat and maize. *Rapid Commun. Mass Spectrom.* 20(18), 2649–2659.
- 713 Torres-Martínez, S., and Ruiz-Vázquez, R.M. (2017). The RNAi universe in fungi: A varied landscape  
714 of small RNAs and biological functions. *Annu. Rev. Microbiol.* 71, 371–391.
- 715 Trail, F., and Common, R. (2000). Perithecial development by *Gibberella zeae*: a light microscopy  
716 study. *Mycologia.* 92, 130–138.
- 717 Urban, M., King, R., Hassani-Pak, K., and Hammond-Kosack, K.E. (2015). Whole-genome analysis of  
718 *Fusarium graminearum* insertional mutants identifies virulence associated genes and unmasks untagged  
719 chromosomal deletions. *BMC Genomics.* 16, 261.
- 720 Vervliet, G., Holsters, M., Teuchy, H., Van Montagu, M., and Schell, J. (1975). Characterization of  
721 different plaque-forming and defective temperate phages in *Agrobacterium* strains. *J. Gen. Virol.* 26,  
722 33–48.
- 723 Wang, S., Li P., Zhang, J., Qiu, D., and Guoa, L. (2016a). Generation of a high resolution map of sRNAs  
724 from *Fusarium graminearum* and analysis of responses to viral infection. *Scientific Reports.* 6, 26151.

- 725 Wang, M., Weiberg, A., Lin, F.M., Thomma, B.P., Huang, H.D., and Jin, H. (2016b). Bidirectional  
726 cross-kingdom RNAi and fungal uptake of external RNAs confer plant protection. *Nature Plants* 2,  
727 16151.
- 728 Weiberg, A., Wang, M., Lin, F.-M., Zhao, H., Zhang, Z., et al. (2013). Fungal small RNAs suppress  
729 plant immunity by hijacking host RNA interference pathways. *Science*. 342(6154), 118–23 .
- 730 Yun, Y., Liu Z., Yin, Y., Jiang, J., Chen, Y., Xu, J.R., and Ma, Z. (2015). Functional analysis of the  
731 *Fusarium graminearum* phosphatome. *New Phytol.* 207(1), 119–134.
- 732 Zanini, S., Šečić, E., Jelonek, L., Kogel, K.-H. (2018). A bioinformatics pipeline for the analysis and  
733 target prediction of RNA effectors in bidirectional communication during plant-microbe interactions.  
734 *Front. Plant Sci.* doi: 10.3389/fpls.2018.01212.
- 735 Zanini, S., Šečić, E., Busche, T., Kalinowski, T., Kogel, K.-H. (2019). Discovery of interaction-related  
736 sRNAs and their targets in the *Brachypodium distachyon* and *Magnaporthe oryzae* pathosystem. BioRxiv doi:  
737 <https://doi.org/10.1101/631945>.
- 738 Zeng, W., Wang, J., Wang, Y., Lin, J., Fu, Y., Xie, J., Jiang, D., Chen, T., Liu H., and Cheng, J. (2018).  
739 Dicer-like proteins regulate sexual development via the biogenesis of perithecium-specific microRNAs  
740 in a plant pathogenic fungus *Fusarium graminearum*. *Frontiers Microb.* doi:  
741 10.3389/fmicb.2018.00818.
- 742 Zhang, H., Xia, R., Meyers, B.C., Walbot, V. (2015). Evolution, functions, and mysteries of plant  
743 ARGONAUTE proteins. *Curr. Opin. Plant Biol.* 27, 84–90.  
744  
745

746 **Table 1:** RNAi pathway genes of *Fusarium graminearum* (*Fg*) as identified from  
 747 [www.Broadinstitute.org](http://www.Broadinstitute.org) and used in this study.  
 748

| RNAi proteins in <i>Neurospora crassa</i>                                  | Homologs in <i>Fg</i> | aa identity (%) | Fusarium gene ID | Gene function in <i>Fg</i>                                                                                                                                                                                                                                                    |
|----------------------------------------------------------------------------|-----------------------|-----------------|------------------|-------------------------------------------------------------------------------------------------------------------------------------------------------------------------------------------------------------------------------------------------------------------------------|
| DICER 1                                                                    | <i>FgDCL1</i>         | 43%             | FGSG_09025       | Antiviral defence (Wang et al., 2016a).<br>Minor role in processing of exogenous dsRNA, hpRNA or pre-miRNA in mycelium (Chen et al., 2015).<br>Major role in sex-specific RNAi pathway: Production of regulatory sRNAs. Required for ascospore production (Son et al., 2017). |
| DICER 2                                                                    | <i>FgDCL2</i>         | 35%             | FGSG_04408       | Processing of exogenous dsRNA, hpRNA and pre-miRNA in mycelium (Chen et al., 2015).<br>Partially shared DCL-1 role in production of regulatory sRNAs in the sexual stage (Son et al., 2017).                                                                                  |
| ARGONAUTE 1<br>(syn. Quelling defective 2)                                 | <i>FgAGO1</i>         | 59%             | FGSG_08752       | Major component in the RISC during quelling (Chen et al., 2015).                                                                                                                                                                                                              |
| ARGONAUTE 2<br>(syn. Suppressor of meiotic silencing 2, SMS2)              | <i>FgAGO2</i>         | 43%             | FGSG_00348       | Minor role in binding siRNA derived from exogenous dsRNA, hpRNA or pre-miRNA in mycelium (Chen et al., 2015).<br>Major role in sex-specific RNAi pathway; required for ascospore production (Son et al., 2017).                                                               |
| RNA-DEPENDENT RNA POLYMERASE<br>(syn. Quelling defective 1)                | <i>FgRdRP1</i>        | 38%             | FGSG_06504       | Maybe associated with secondary sRNA production (Chen et al., 2015).                                                                                                                                                                                                          |
|                                                                            | <i>FgRdRP4</i>        | 33%             | FGSG_04619       | Maybe associated with secondary sRNA production (Chen et al., 2015).                                                                                                                                                                                                          |
| RNA-DEPENDENT RNA POLYMERASE<br>(syn. Suppressor of ascus dominance, SAD1) | <i>FgRdRp2</i>        | 42%             | FGSG_08716       | Maybe associated with secondary sRNA production (Chen et al., 2015).                                                                                                                                                                                                          |
|                                                                            | <i>FgRdRp5</i>        | 29 %            | FGSG_09076       | Roles in the antiviral defence.<br>Maybe associated with secondary sRNA production (Chen et al., 2015).                                                                                                                                                                       |
| RNA-DEPENDENT RNA POLYMERASE (RRP3)                                        | <i>FgRdRP3</i>        | 47%             | FGSG_01582       | Maybe associated with secondary sRNA production (Chen et al., 2015).                                                                                                                                                                                                          |
| QDE2-INTERACTING PROTEIN                                                   | <i>FgQIP</i>          | 32%             | FGSG_06722       | The homolog has been identified in (Chen et al., 2015), but not yet studied in depth.                                                                                                                                                                                         |
| RecQ HELICASE QDE3                                                         | <i>FgQDE3</i>         | 46%             | FGSG_00551       | not studied.                                                                                                                                                                                                                                                                  |

749

750 **Table 2:** Function of *Fusarium graminearum* RNAi mutants in various developmental and pathogenic  
 751 processes.

| Fungal strain                | <sup>1</sup> aurofusarin pigment | <sup>2</sup> conidiation | <sup>2</sup> conidial germination | ascospore discharge | ascospore germination | <sup>3</sup> spike infection | rDON | <sup>4</sup> SIGS |
|------------------------------|----------------------------------|--------------------------|-----------------------------------|---------------------|-----------------------|------------------------------|------|-------------------|
| IFA WT                       | +                                | +                        | +                                 | +                   | +                     | +                            | +    | +                 |
| <i>Adcl1</i>                 | -                                | --                       | (-)                               | --                  | (+)                   | --                           | (-)  | -                 |
| <i>Adcl2</i>                 | -                                | -                        | (-)                               | -                   | +                     | ++                           | (-)  | -                 |
| <i>Ago1</i>                  | ++                               | --                       | --                                | -                   | (+)                   | +                            | --   | (+)               |
| <i>Ago2</i>                  | +                                | (+)                      | --                                | --                  | +                     | -                            | --   | (+)               |
| <i>Ardrp1</i>                | -                                | (+)                      | (-)                               | --                  | +                     | +                            | +    | (+)               |
| <i>Ardrp2</i>                | ++                               | --                       | +                                 | --                  | +                     | +                            | --   | nd                |
| <i>Ardrp3</i>                | ++                               | --                       | (-)                               | +                   | --                    | +                            | --   | nd                |
| <i>Ardrp4</i>                | ++                               | -                        | --                                | +                   | --                    | +                            | --   | nd                |
| <i>Aqde3</i>                 | -                                | --                       | +                                 | --                  | +                     | +                            | +    | +                 |
| <i>Aqip</i>                  | -                                | --                       | +                                 | -                   | (+)                   | +                            | +    | --                |
| <i>Adcl1</i><br><i>Adcl2</i> | nd                               | nd                       | nd                                | nd                  | nd                    | nd                           | nd   | --                |
| PH1                          | nd                               | nd                       | nd                                | nd                  | nd                    | nd                           | nd   | +                 |

752 <sup>1</sup>In liquid PEG medium under day light conditions; <sup>2</sup>Dimmed light (2  $\mu\text{mol m}^{-2} \text{s}^{-1}$ ), liquid SN cultures; <sup>3</sup>At 9 dpi  
 753 (not on 13 dpi); <sup>4</sup>On barley leaves, 20 ng  $\mu\text{L}^{-1}$  CYP3RNA; conclusion from two independent validation assays.

752  
 753  
 754  
 755



756 **Table 3:** Trichothecenes produced by RNAi mutants in infected wheat kernels at 13 dpi.  
757

| Samples                   | ng <i>Fg</i> DNA /mg seed<br>d.w. | DON [mg/kg<br>seed] | DON/DNA | <sup>1</sup> A-DON [mg/kg<br>seed] | <sup>2</sup> A-<br>DON/DON<br>x1000 |
|---------------------------|-----------------------------------|---------------------|---------|------------------------------------|-------------------------------------|
| Mock (without <i>Fg</i> ) | 0                                 | 0.00                | 0       | 0                                  | 0                                   |
| $\Delta ago1$             | 0.84                              | 12.7                | 15.2    | 0.45                               | 36                                  |
| $\Delta ago2$             | 1.28                              | 32.3                | 25.2    | 1.04                               | 32                                  |
| $\Delta dcl1$             | 2.86                              | 61.9                | 21.6    | 1.87                               | 30                                  |
| $\Delta dcl2$             | 2.03                              | 56.6                | 27.9    | 1.89                               | 33                                  |
| $\Delta rdrp1$            | 4.84                              | 86.7                | 17.9    | 3.51                               | 40                                  |
| $\Delta rdrp2$            | 0.95                              | 16.9                | 17.8    | 0.43                               | 25                                  |
| $\Delta rdrp3$            | 0.78                              | 12.3                | 15.6    | 0.35                               | 29                                  |
| $\Delta rdrp4$            | 0.47                              | 4.90                | 10.3    | 0.15                               | 31                                  |
| $\Delta qip$              | 2.53                              | 68.7                | 27.2    | 2.87                               | 42                                  |
| $\Delta qde3$             | 4.33                              | 82.3                | 19.0    | 3.91                               | 47                                  |
| IFA WT                    | 2.18                              | 78.3                | 35.9    | 2.58                               | 33                                  |

758  
759  
760  
761  
762  
763

DON, deoxynivalenol; A-DON, acetyldeoxynivalenol.

<sup>1</sup> 3A-DON (3-acetyldeoxynivalenol) and 15A-DON (15-acetyldeoxynivalenol) were measured

<sup>2</sup> Ratio of concentrations of A-DON and DON, multiplied by 1000

764 **Supplement data:**

765

766

767 **Supplement figures**

768

769 **Figure S1:**

770 **Schematic representation of the gene replacement strategy used for *F. graminearum***  
771 **transformation.** Yellow box: the target gene that has to be replaced by KO; dark green box:  
772 selection marker gene, in this case the antibiotic resistance gene (*hygromycin B*  
773 *phosphotransferase* of *E. coli*, *hph*). Blue arrow: Homologous recombination sequences,  
774 typically ~1 kb long; Black arrows: template area for primers binding used for transformants  
775 genotyping. PgpdA: Promoter region of the *Glyceraldehyde-3-phosphate dehydrogenase* gene  
776 of *Aspergillus nidulans*; TtrpC: termination region of the *Aspergillus nidulans trpC* gene.

777

778

779 **Fig. S2. Compromised expression of deleted RNAi genes in *F. graminearum* knockout**  
780 **(KO) mutants.** Expression of the targeted genes in respective Fusarium mutants. Transcript  
781 levels were analyzed by qRT-PCR from five-day-old PEG liquid cultures and transcript  
782 quantified by normalization to Fusarium  $\beta$ -*TUBULIN* (*FgTub*) or *ELONGATION FACTOR A*  
783 (*FgEF1a*) and comparison to IFA WT.

784

785

786 **Figure S3. Colony morphology and growth of RNAi KO mutants.** Fusarium mutants and wt  
787 IFA WT were grown for 5 days on solid (A) PDA (potato dextrose agar), (B) SN (synthetic  
788 nutrient), (C) CM (*Aspergillus* complete medium) and in liquid PEG medium without  
789 hygromycin. The mutants showed differences in pigmentation as follows:  $\Delta$ *ago1*,  $\Delta$ *rdrp2*,  
790  $\Delta$ *rdrp3* and  $\Delta$ *rdrp4* darker pigmentation;  $\Delta$ *dcl1*,  $\Delta$ *dcl2* and  $\Delta$ *rdrp1* reduced pigmentation  
791 compared to IFA WT.

792

793

794 **Fig. S4. Infection of wheat spikes with *F. graminearum* RNAi mutants and IFA WT.**  
795 Thousand grain weight (TGW) of infected wheat spikes. Mock control: Kernels treated with  
796 0.002% Tween 20; mature kernels: completely mature Apogee kernels.

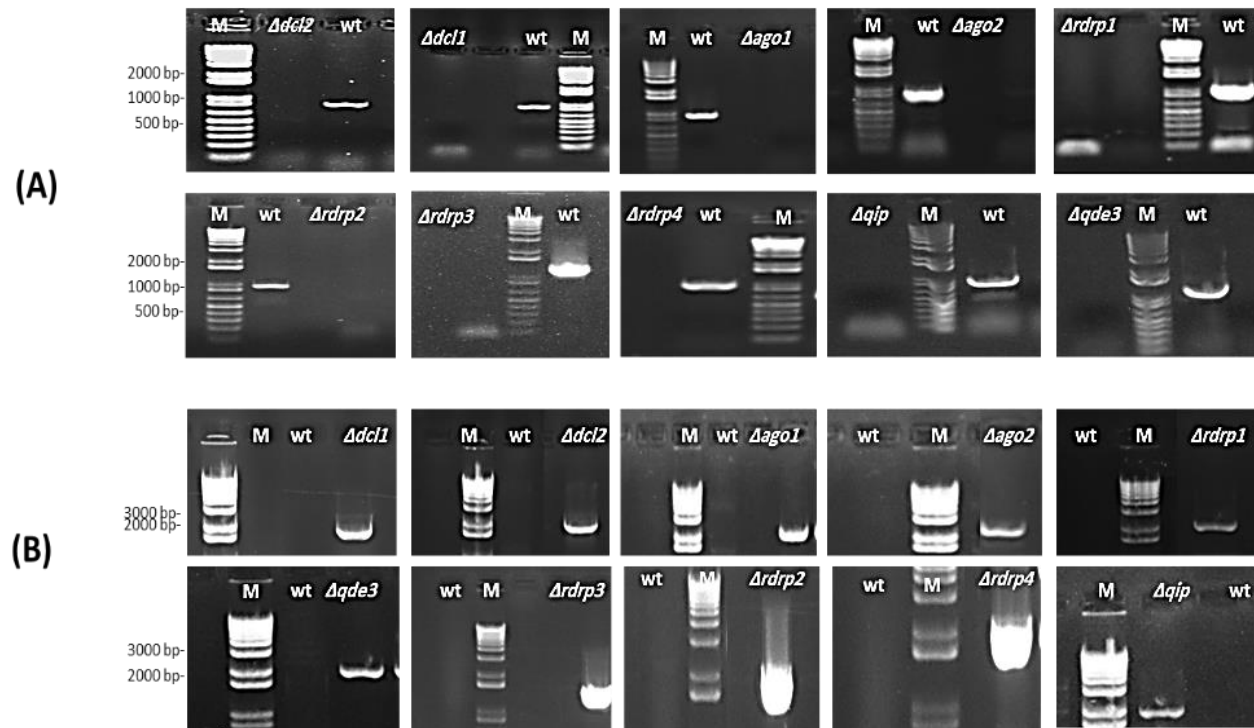

**Fig. 1**

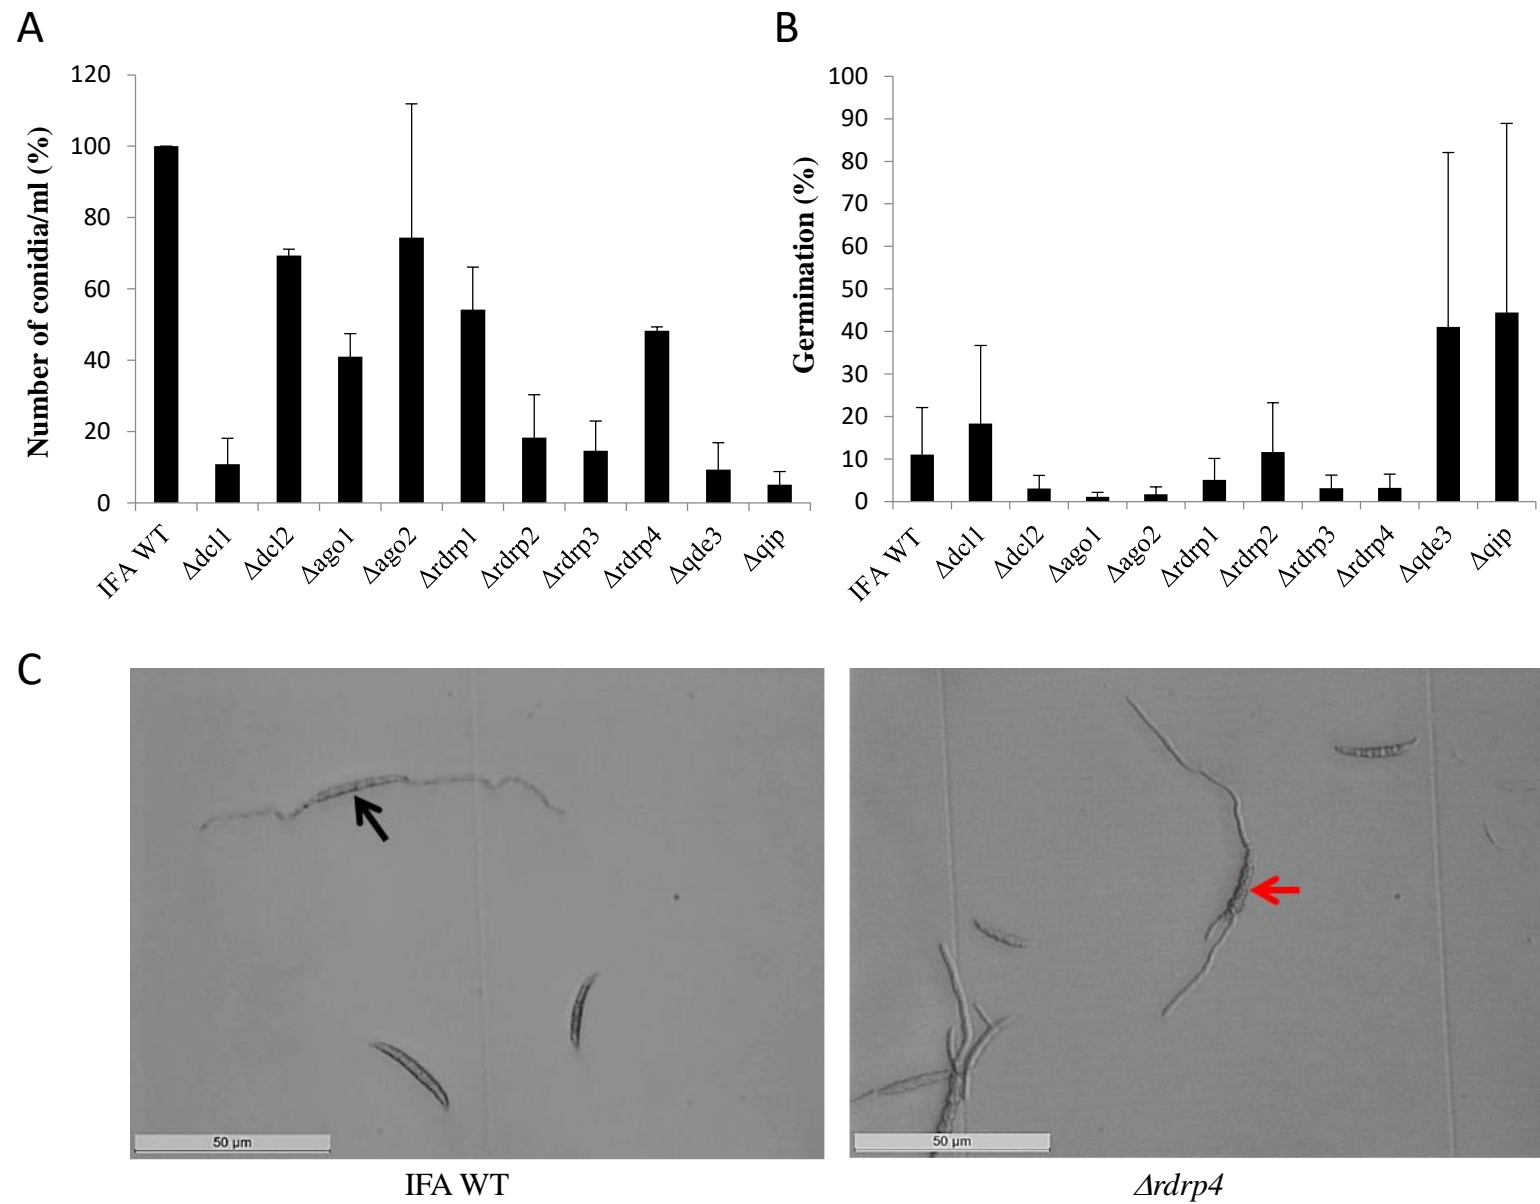

**Fig. 2**

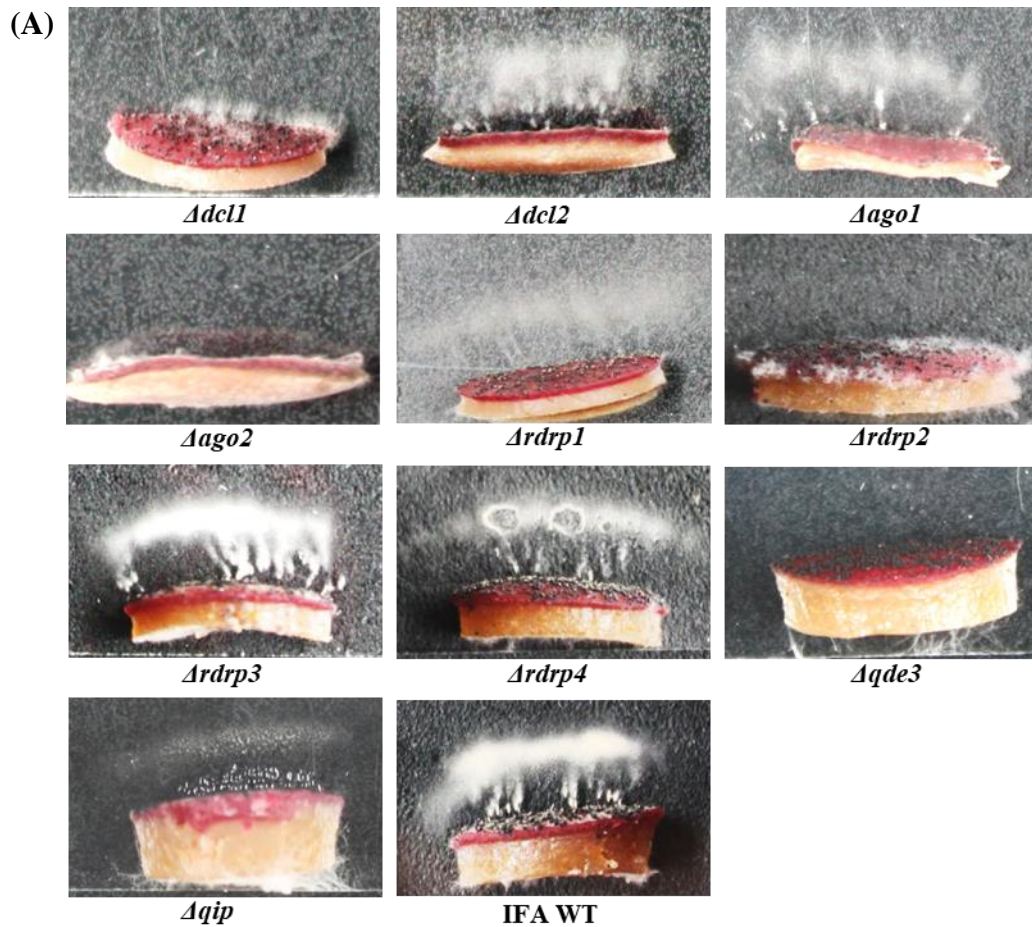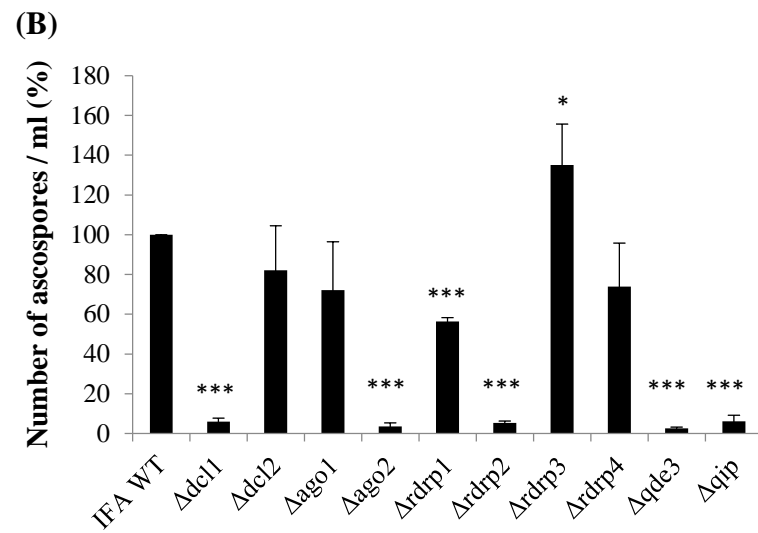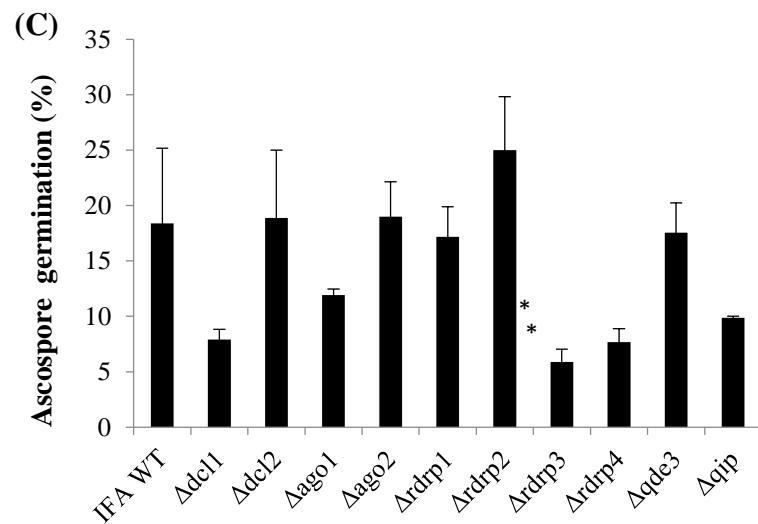

**Fig. 3**

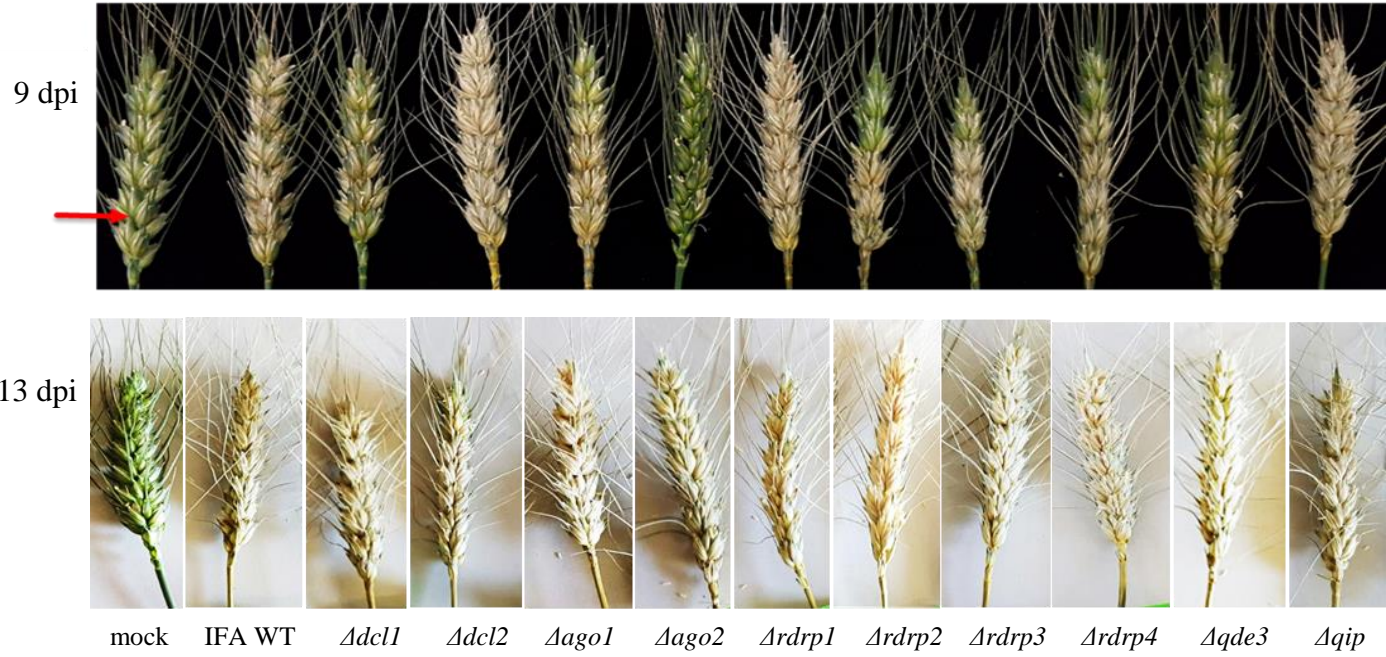

**Fig. 4**



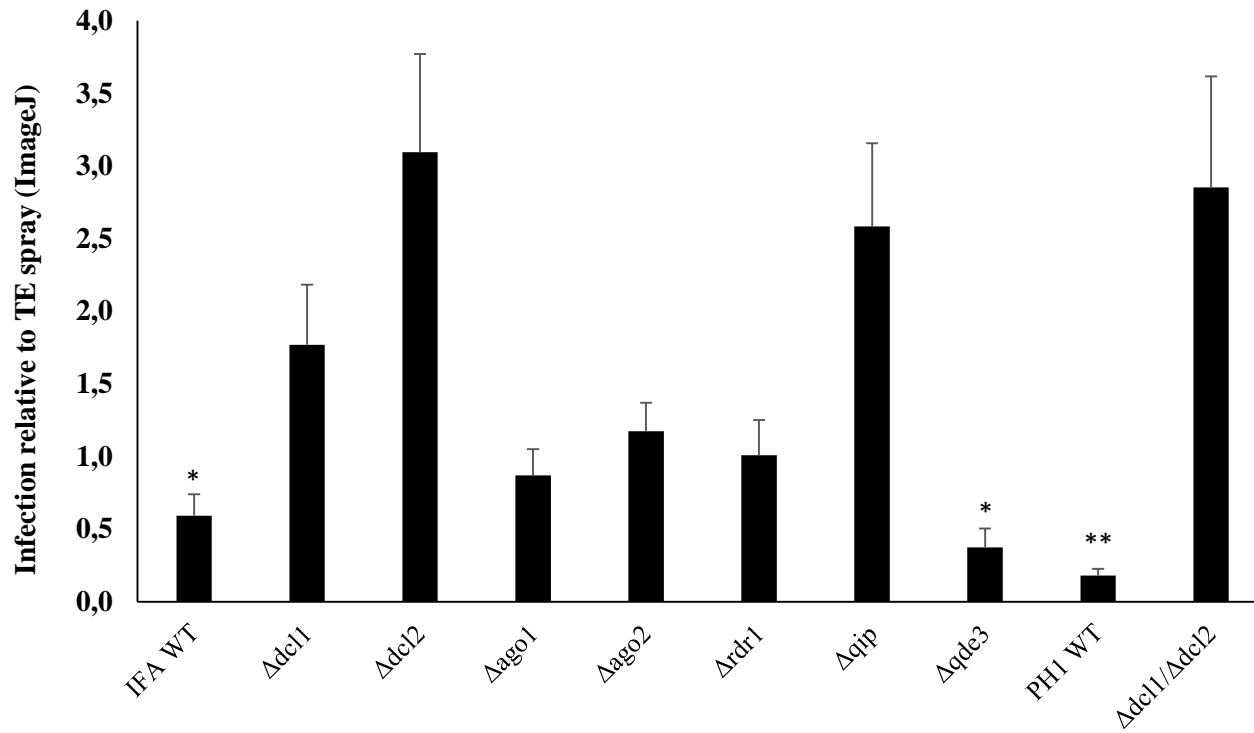

**Fig. 5A**

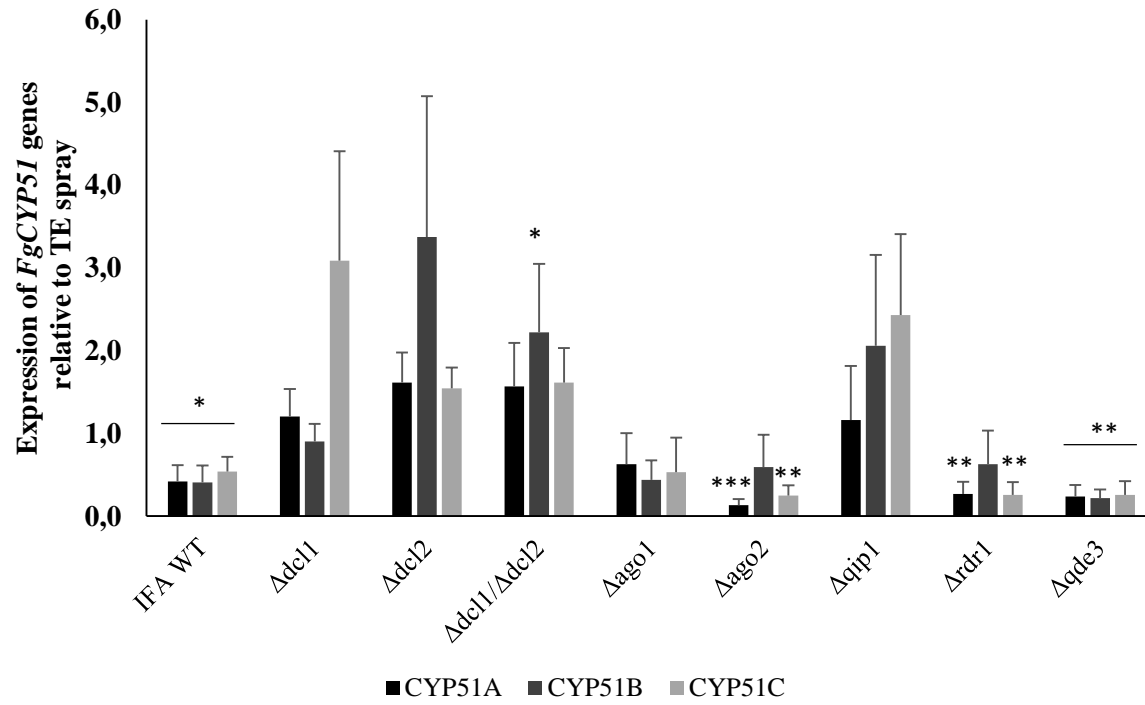

**Fig. 5B**
